# Supplementary material for: HMGA2 alleviates ferroptosis by promoting GPX4 expression in pancreatic cancer cells
Source: PubMed Central journal article supplement (PMC10944463; doi:10.1038/s41419-024-06592-y), 2024-03-16

# Figure 2C

MIAPaCa-2

MOCK HMGA2

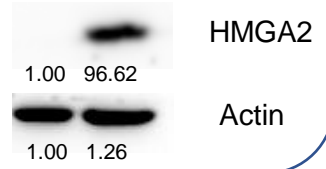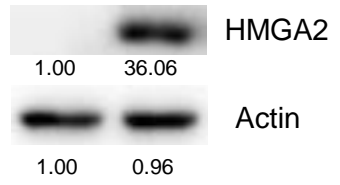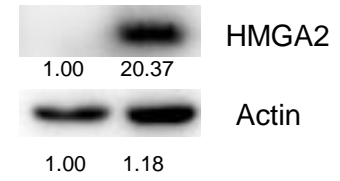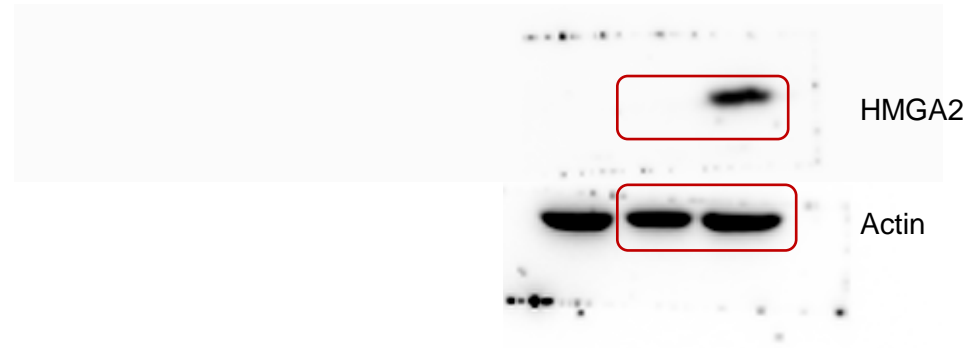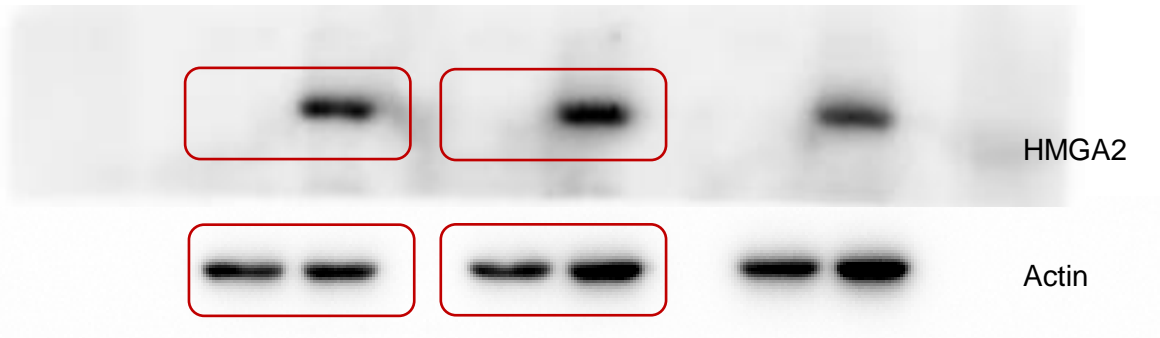

Figure 2D

PANC-1

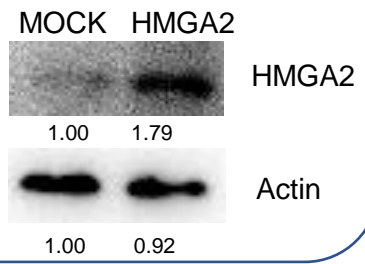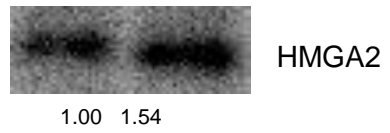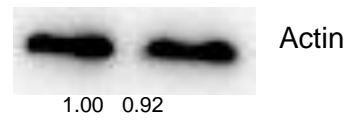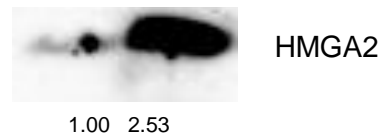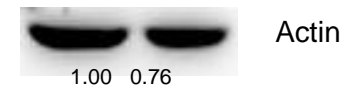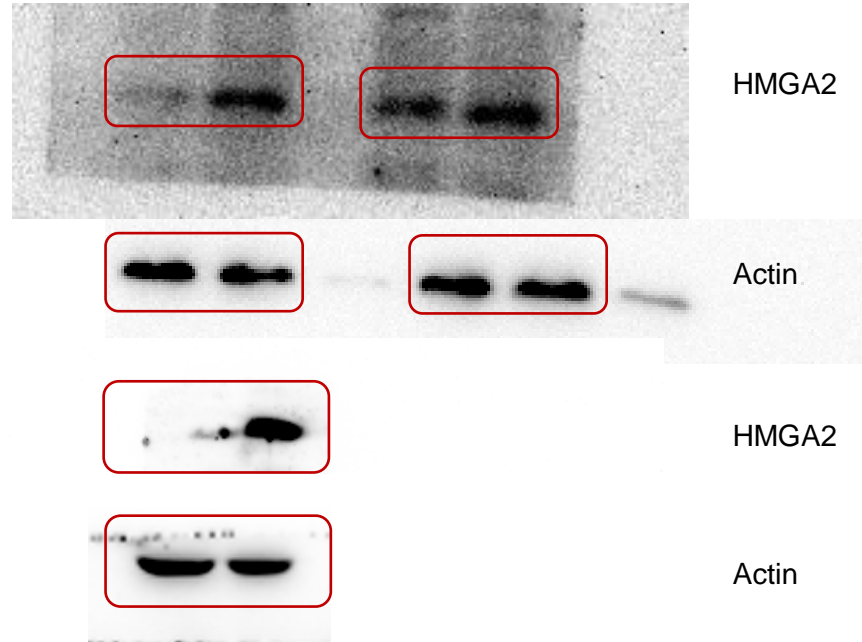

Figure 2E

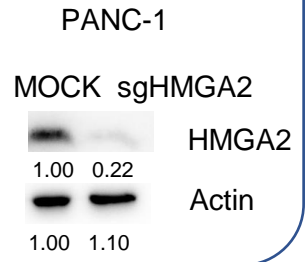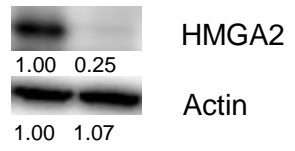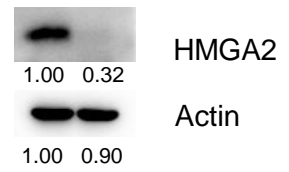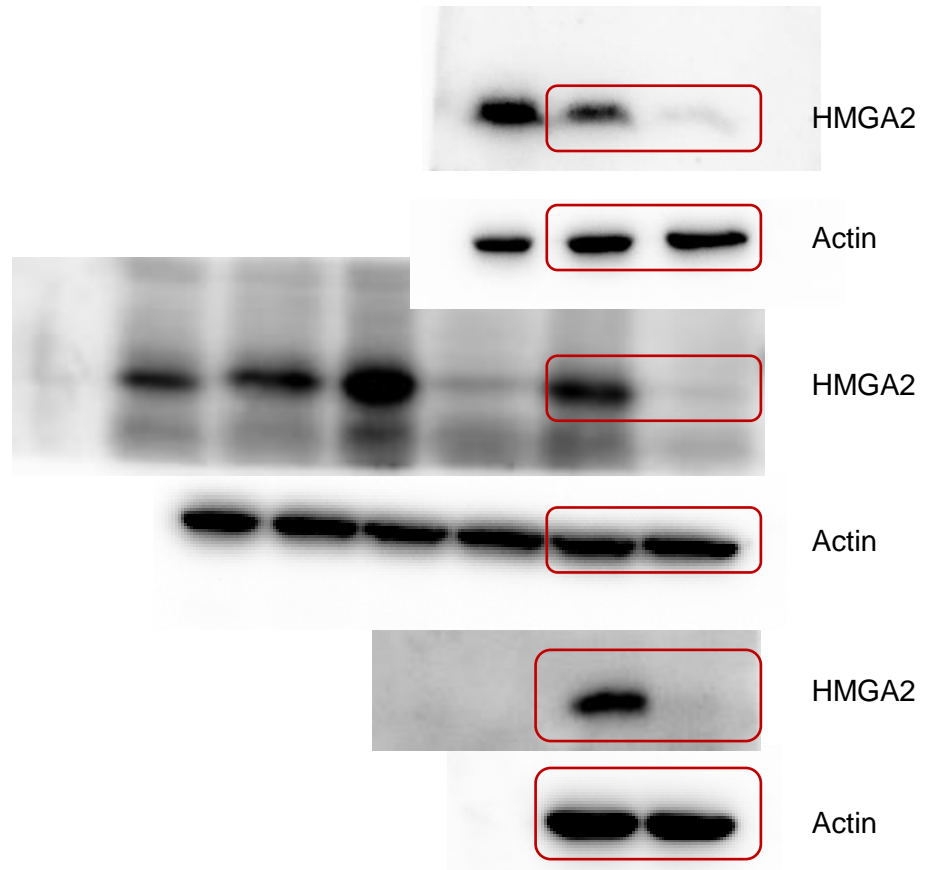

Figure 5A

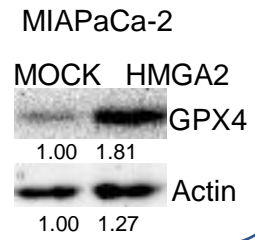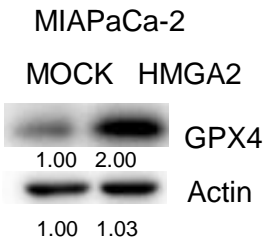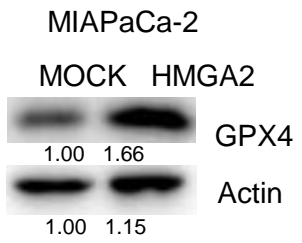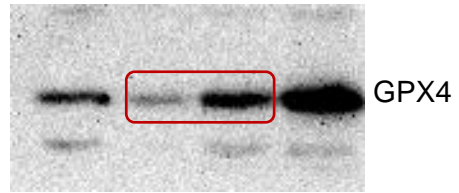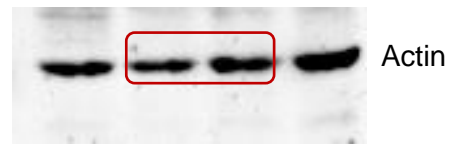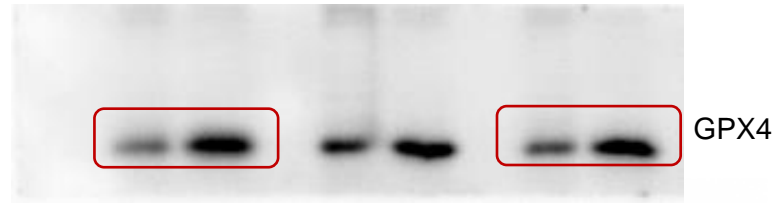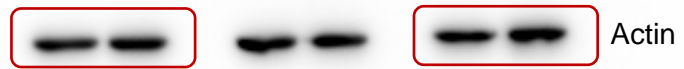

Figure 5B

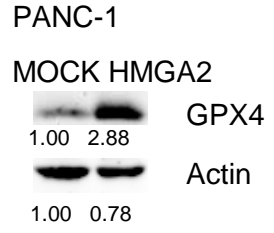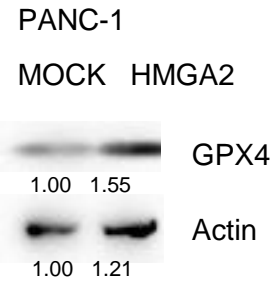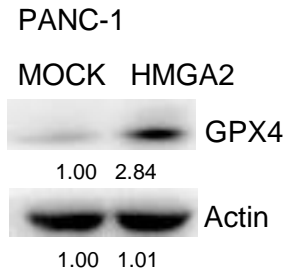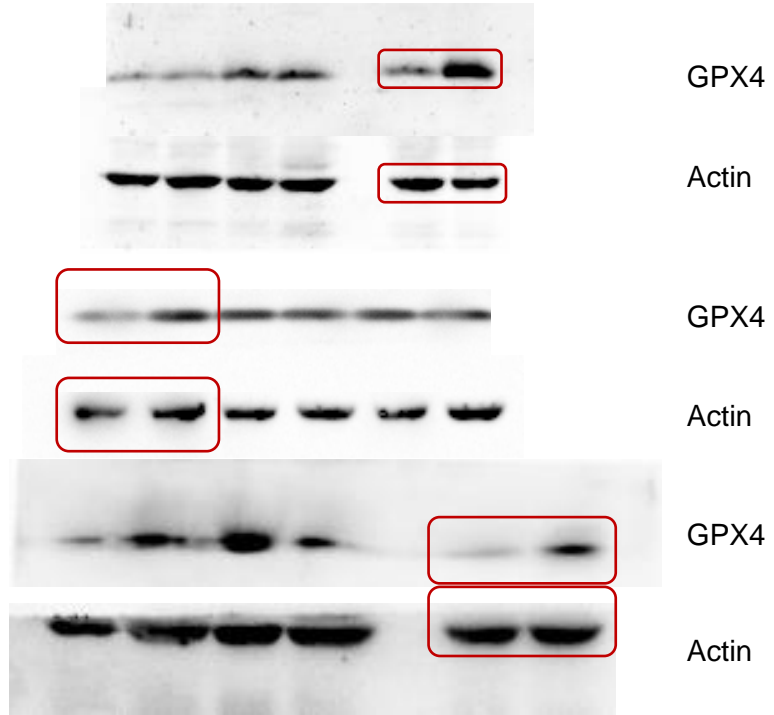

Figure 5C

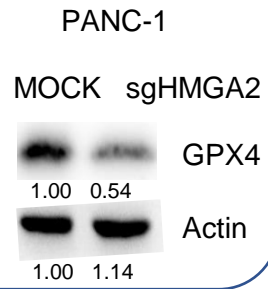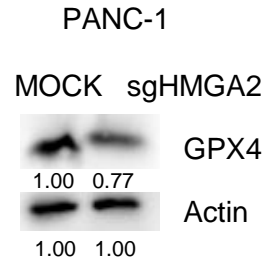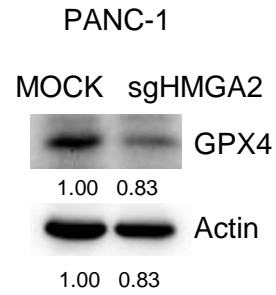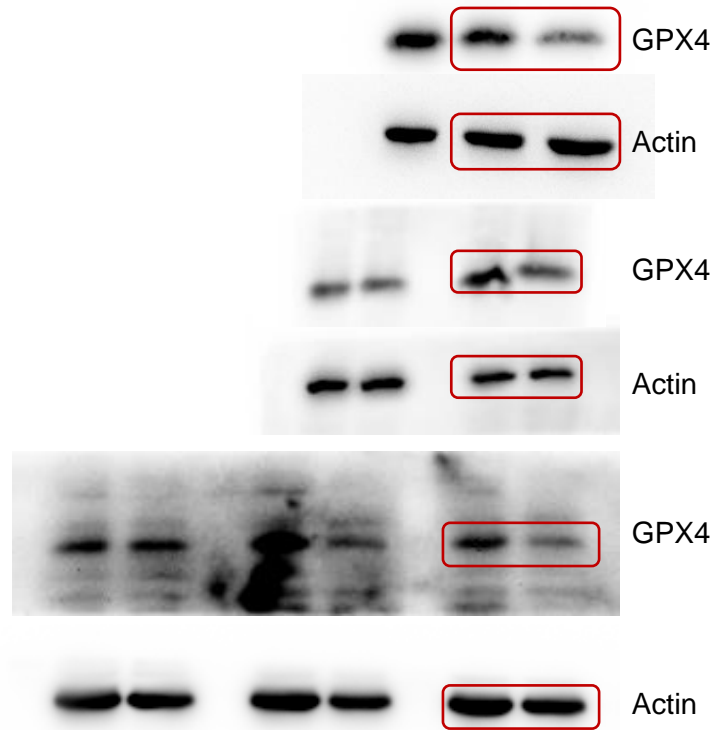

Figure 5D

BXPC-3

sgNC sgHMGA2

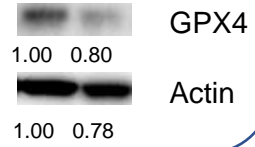

BXPC-3

sgNC sgHMGA2

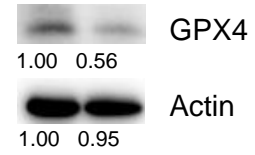

BXPC-3

sgNC sgHMGA2

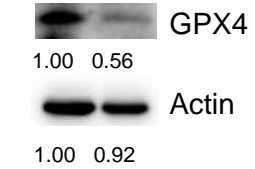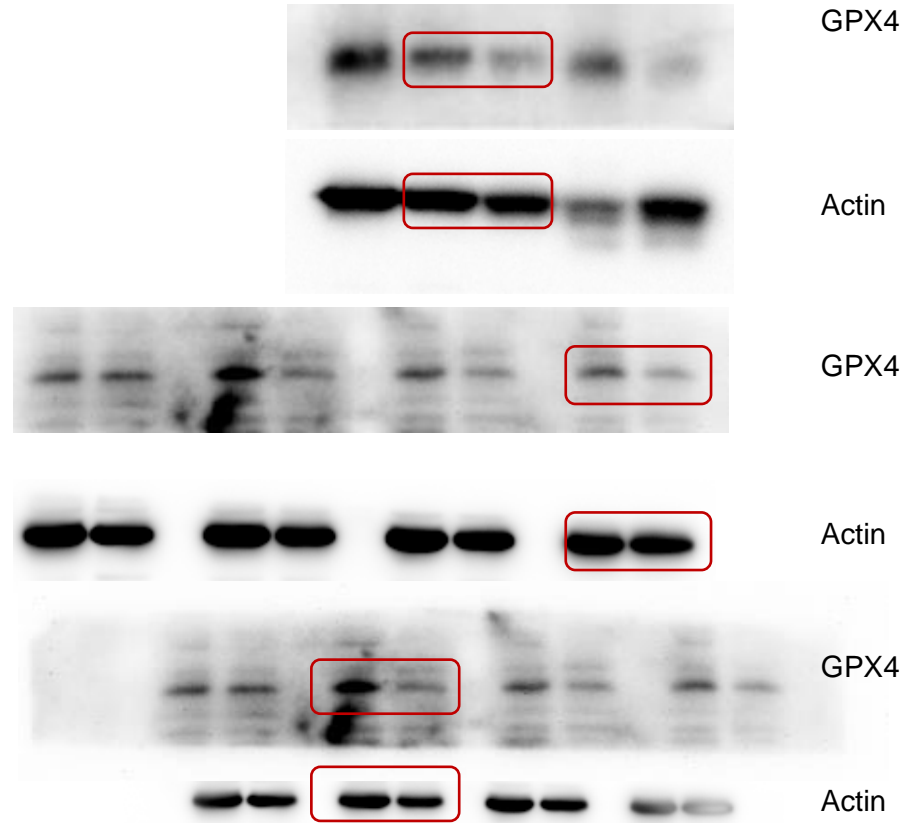

Figure 6C

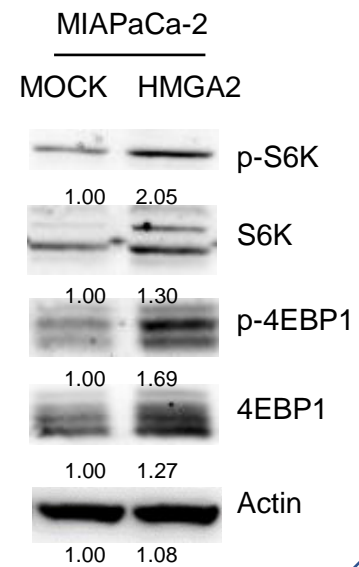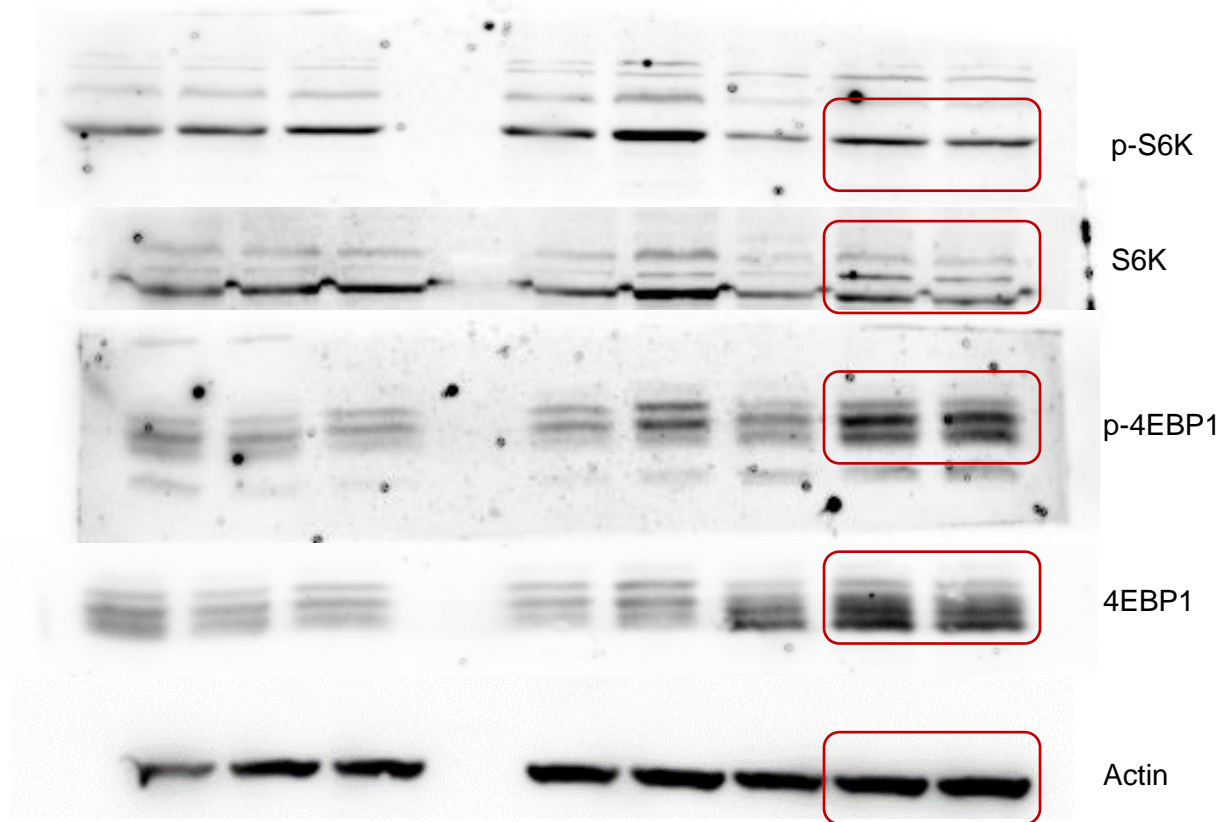



Figure 6D

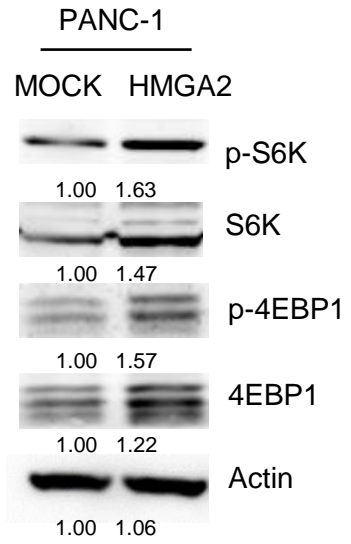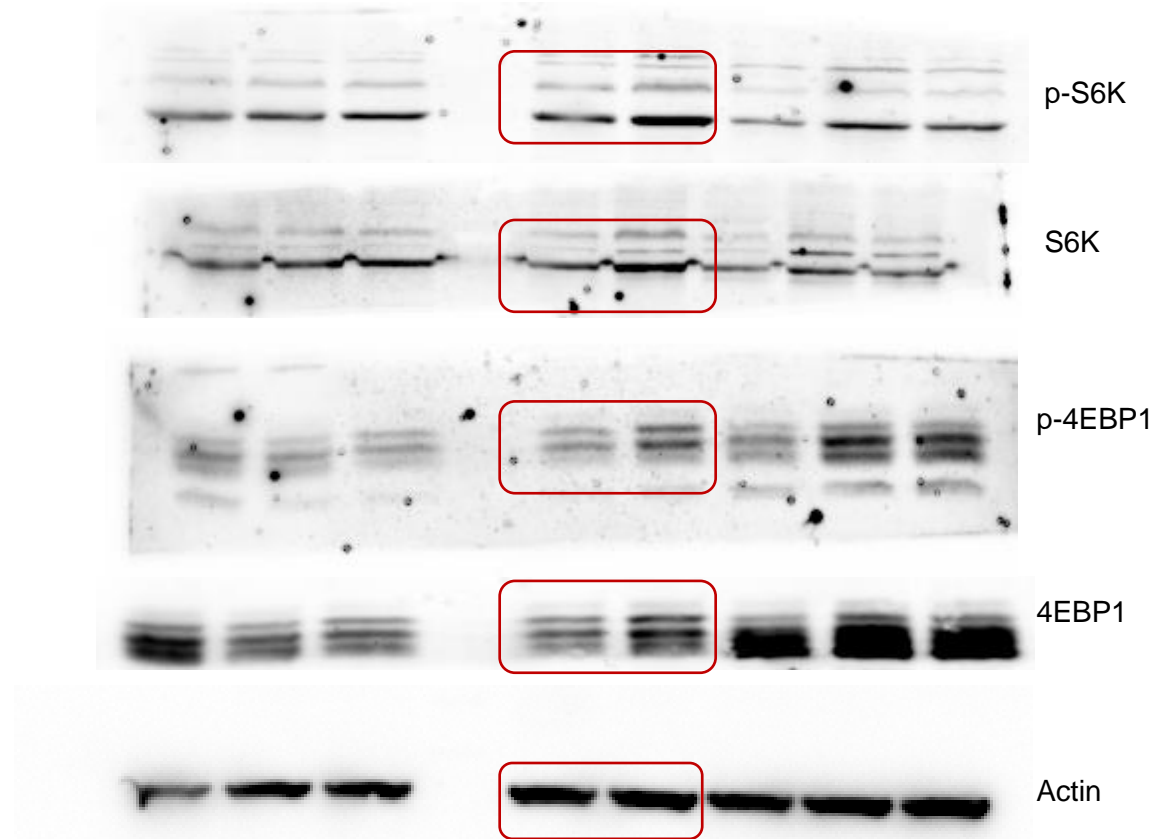

Figure 6E

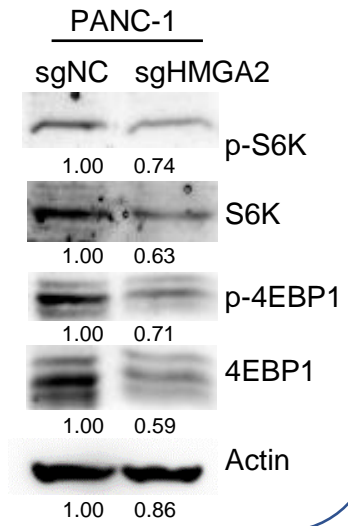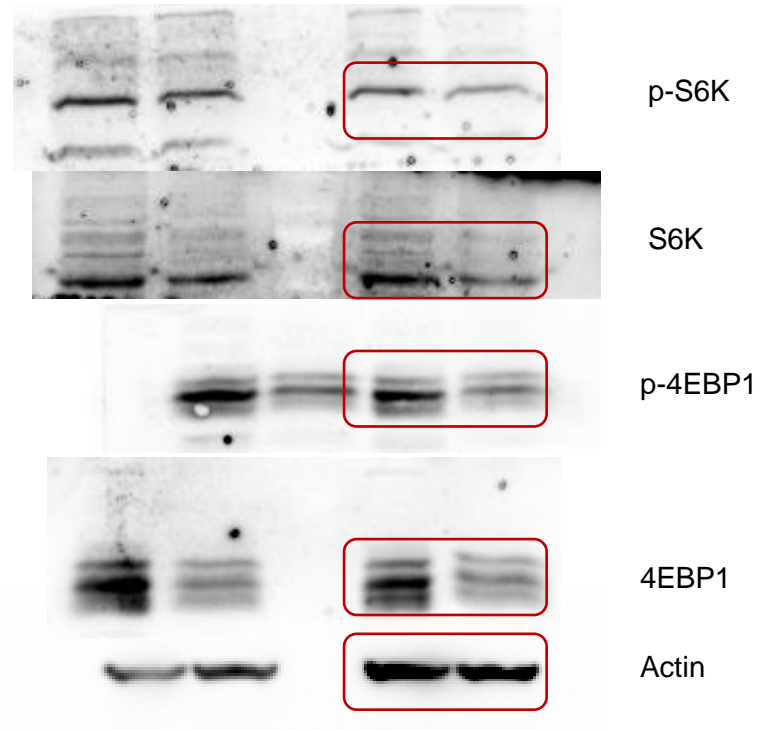

Figure 6F

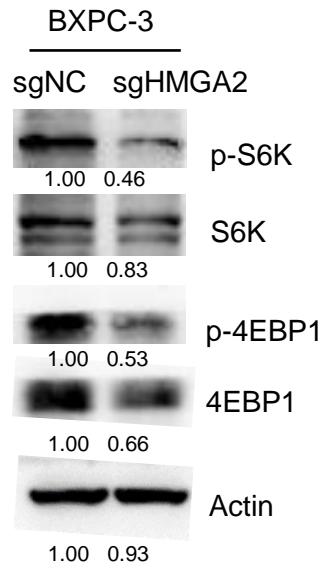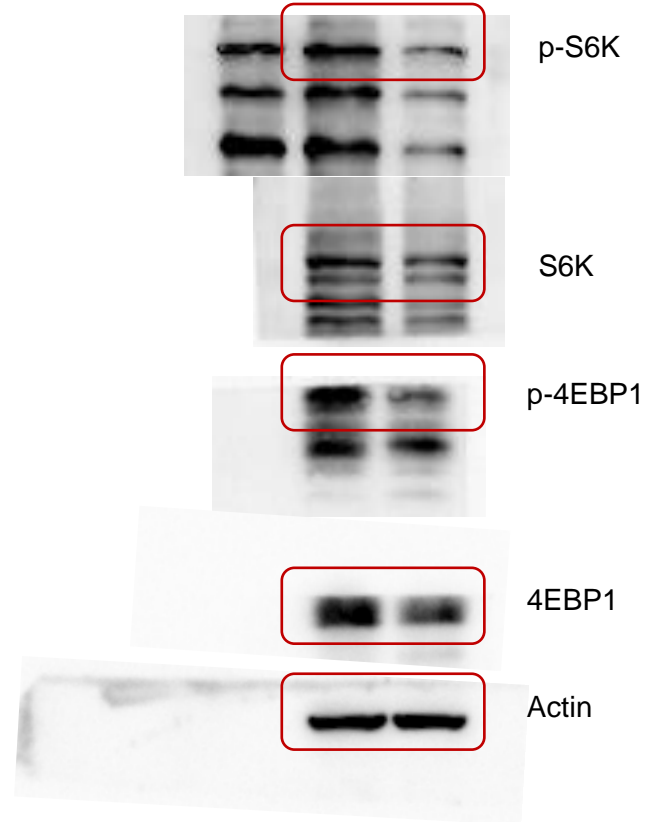

Figure 7A

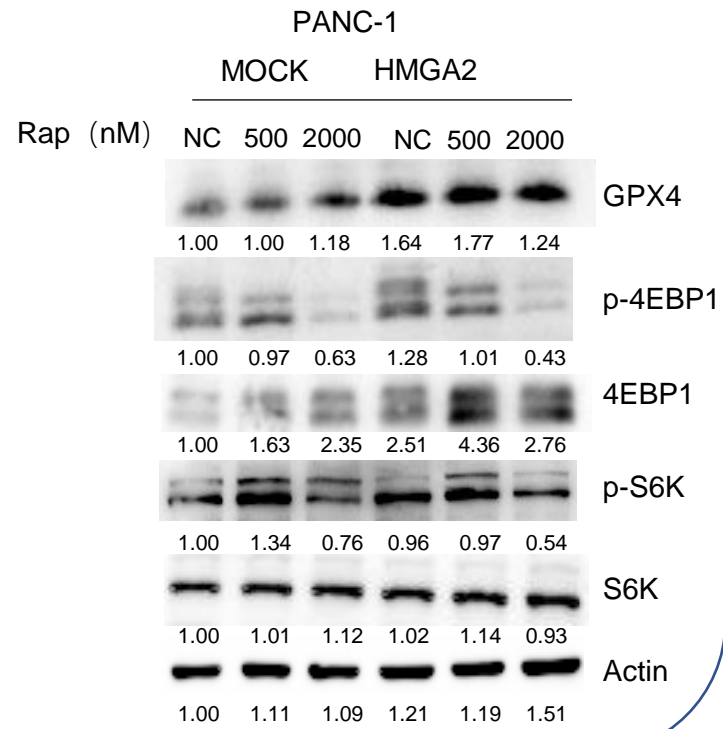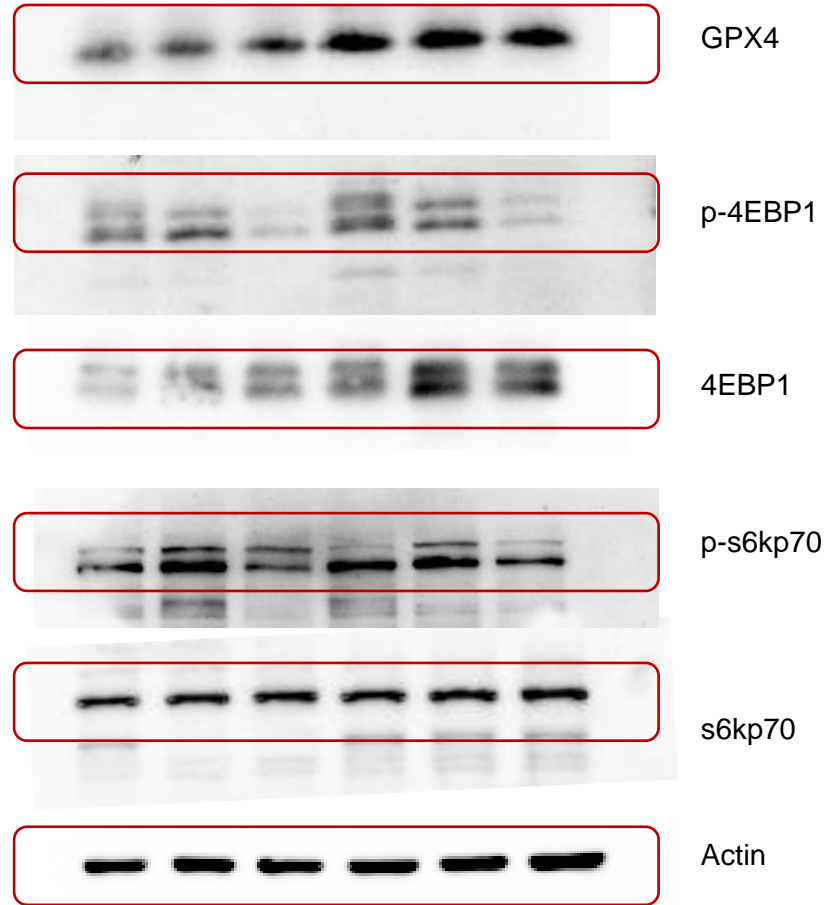

PANC-1

| Rap (nM) | MOCK |      |      | HMGA2 |      |      |
|----------|------|------|------|-------|------|------|
|          | NC   | 500  | 2000 | NC    | 500  | 2000 |
|          | 1.00 | 0.87 | 1.23 | 2.74  | 2.33 | 2.33 |
|          | 1.00 | 0.51 | 0.47 | 1.55  | 0.82 | 0.49 |
|          | 1.00 | 1.04 | 1.06 | 1.49  | 2.83 | 2.70 |
|          | 1.00 | 0.38 | 0.31 | 0.87  | 1.00 | 0.71 |
|          | 1.00 | 1.06 | 1.13 | 1.05  | 0.90 | 0.77 |
|          | 1.00 | 1.11 | 1.03 | 1.10  | 1.06 | 1.24 |

GPX4

p-4EBP1

4EBP1

p-S6K

S6K

Actin

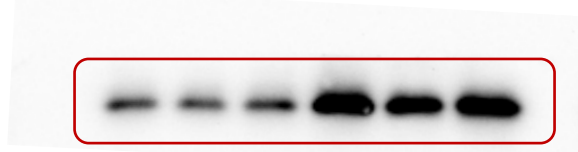

GPX4

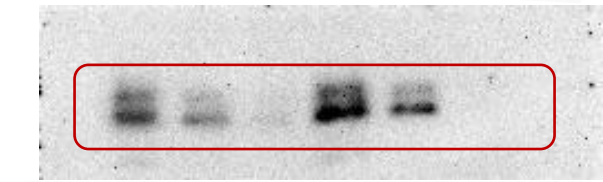

p-4EBP1

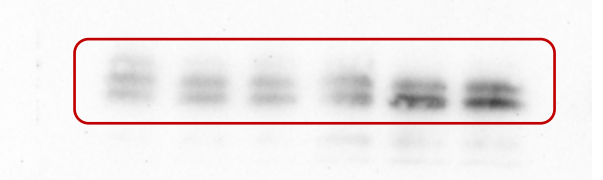

4EBP1

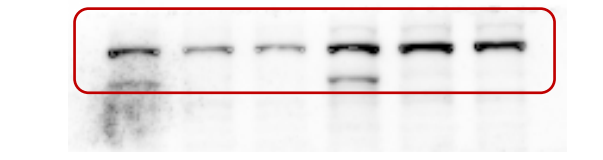

p-S6K

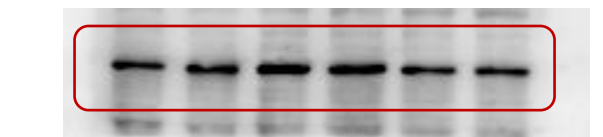

S6K

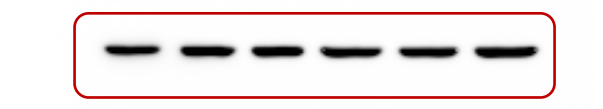

Actin

PANC-1

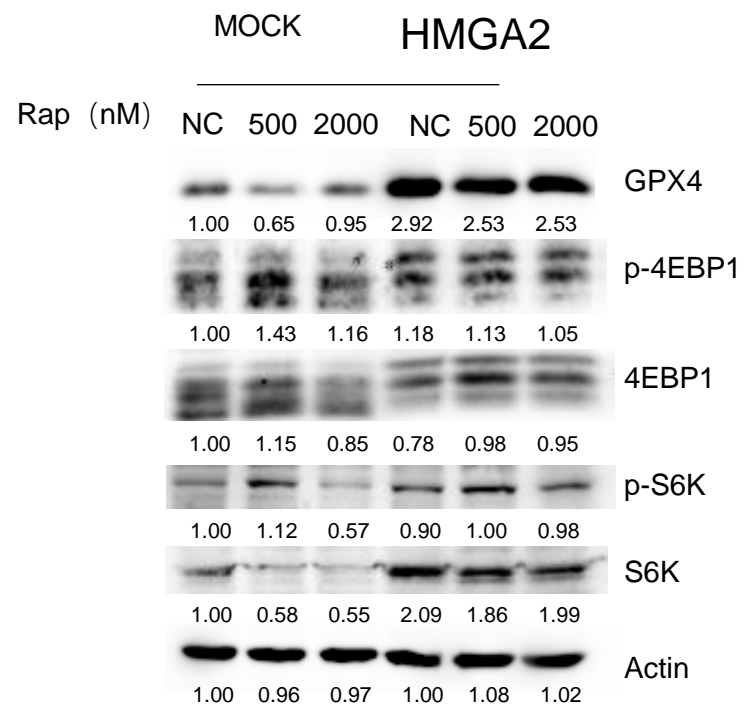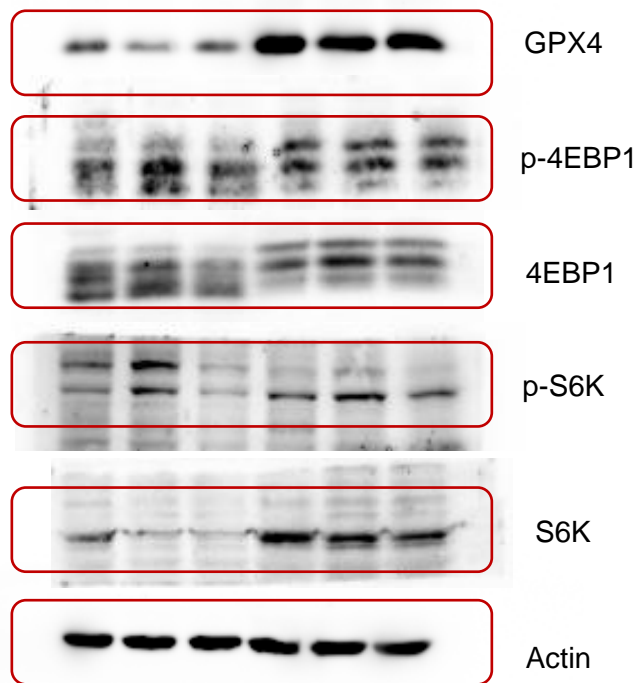

Figure 7A

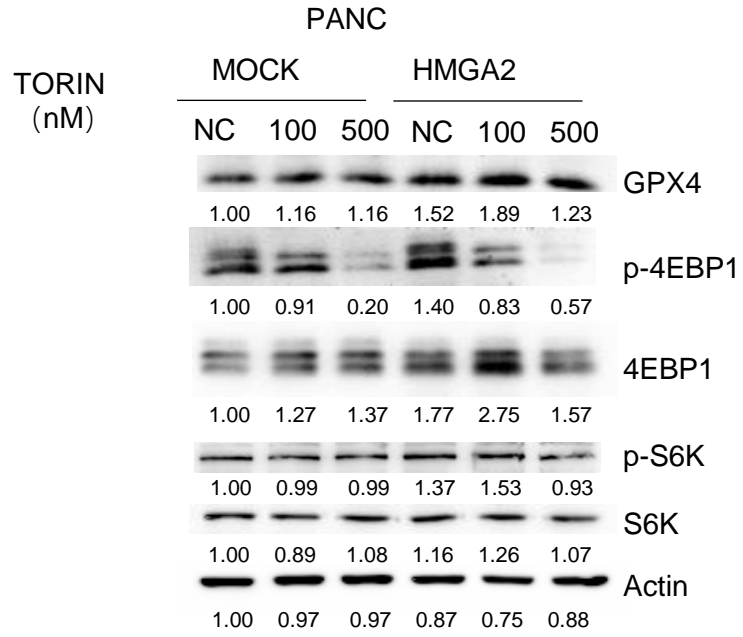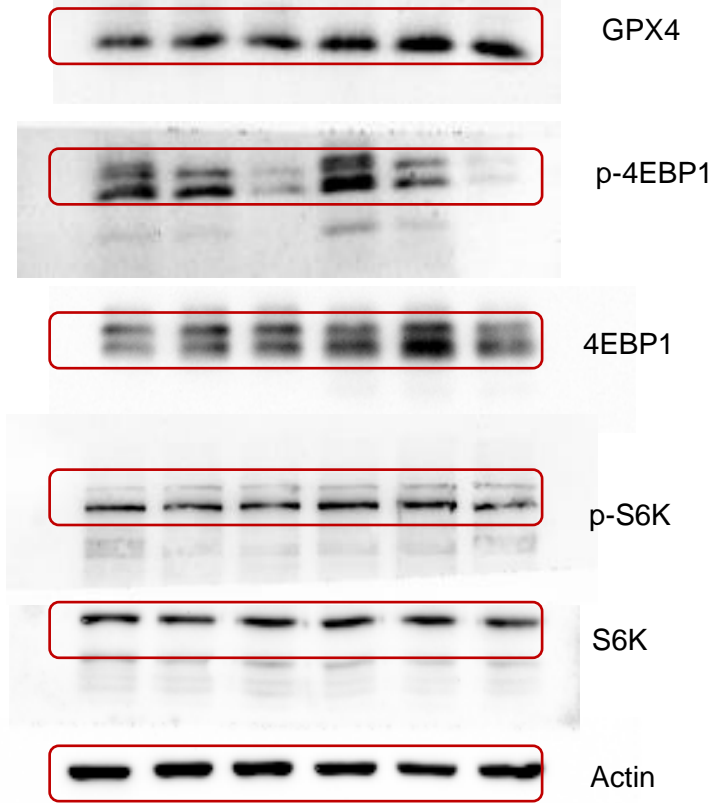

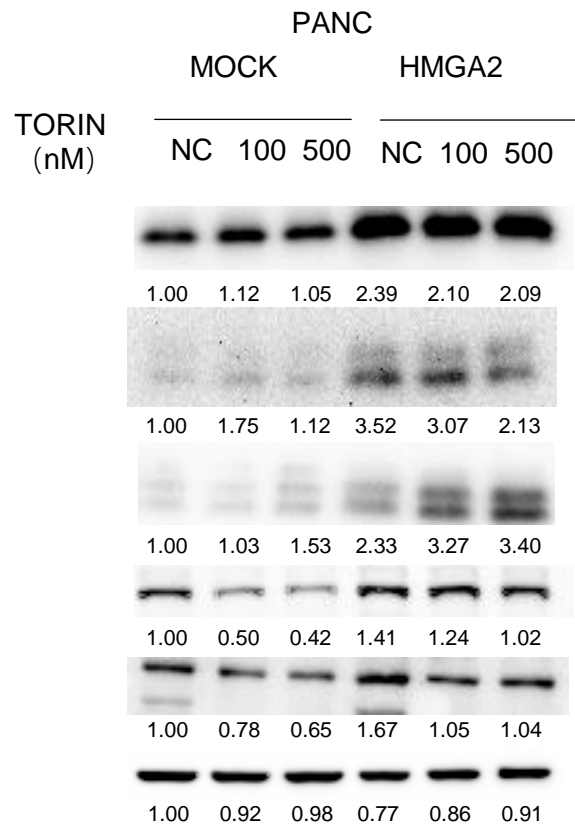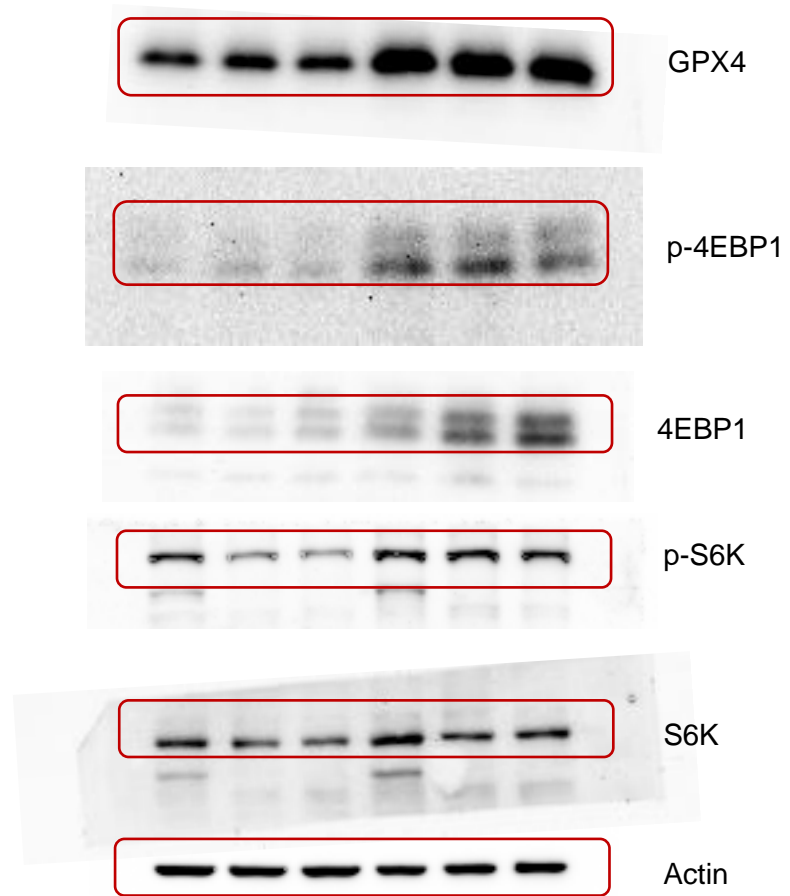



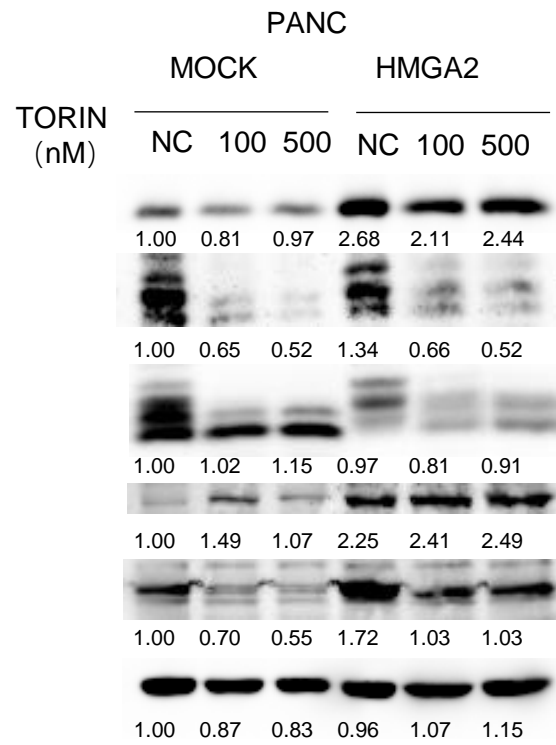

GPX4  
p-4EBP1  
4EBP1  
p-S6K  
S6K  
Actin

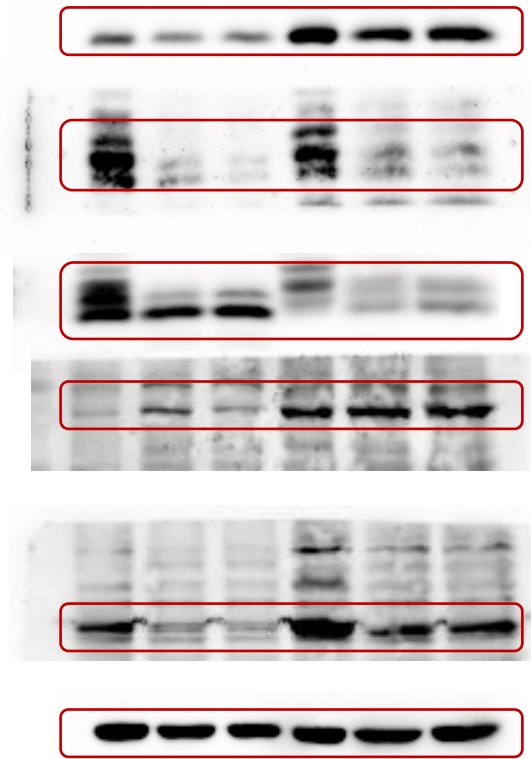

GPX4  
p-4EBP1  
4EBP1  
p-S6K  
S6K  
Actin

Figure 7B

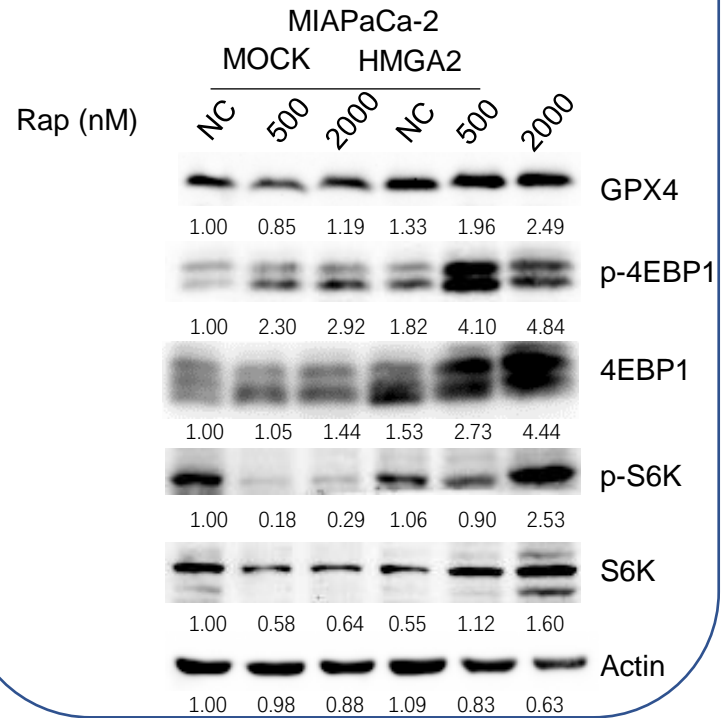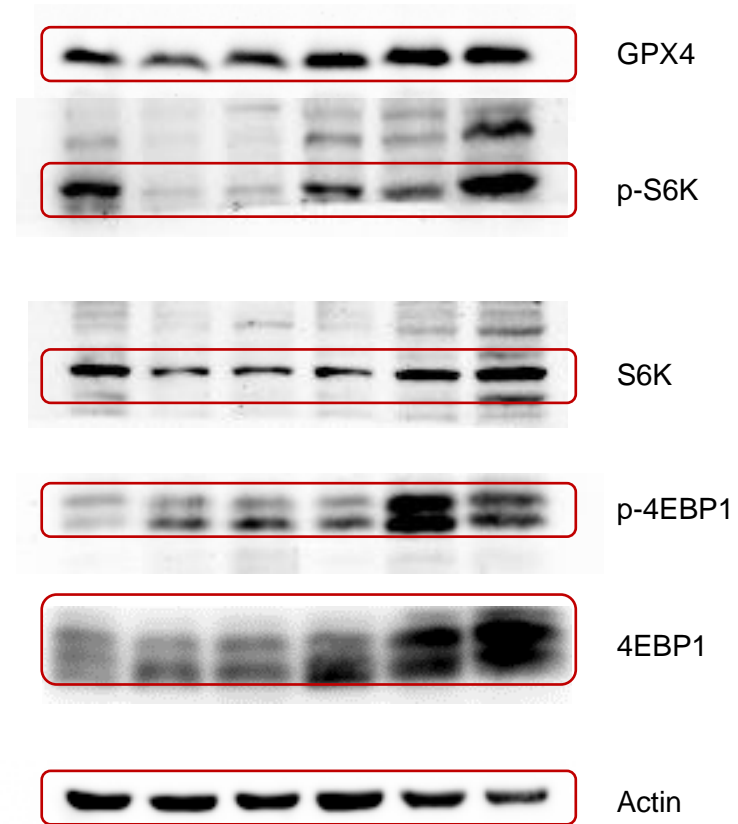

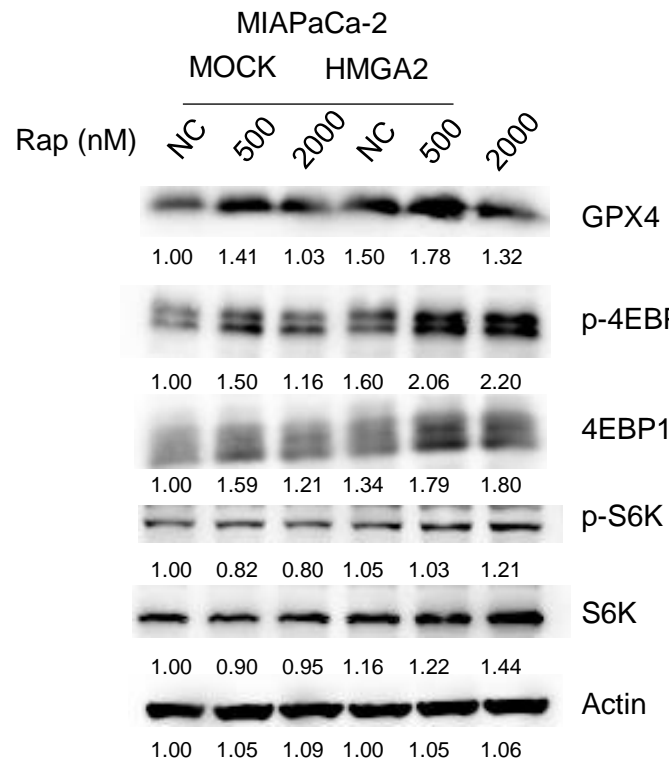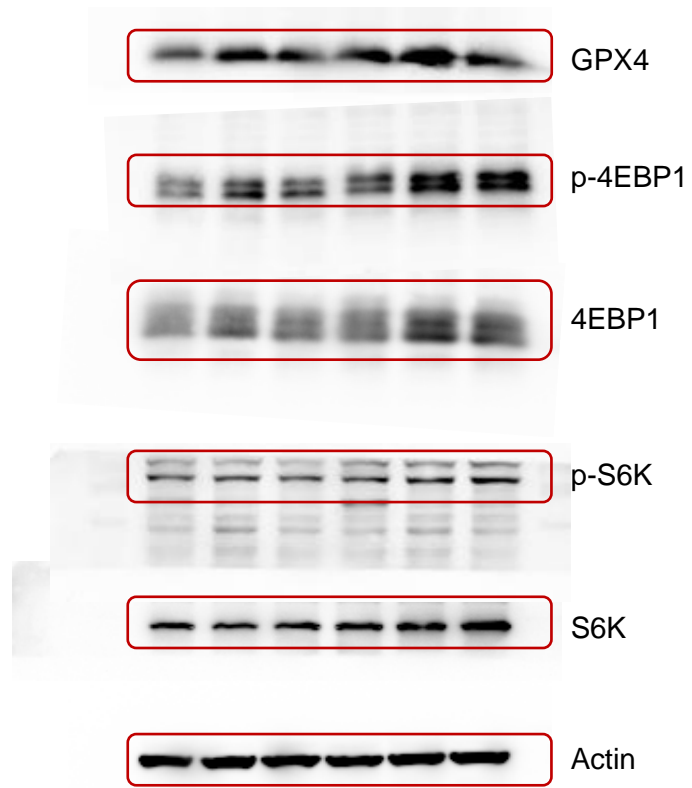

MIAPaCa-2

MOCK      HMGA2

Rap (nM)    NC    500    2000    NC    500    2000

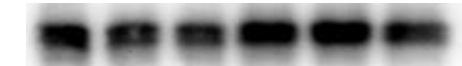

1.00   1.01   0.94   1.17   0.89   0.88

GPX4

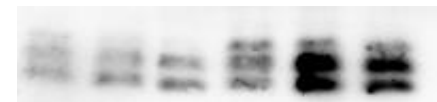

1.00   1.19   1.33   2.25   3.69   3.47

p-4EBP1

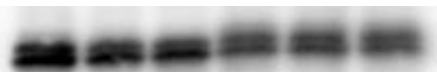

1.00   0.91   0.86   0.65   1.06   1.03

4EBP1

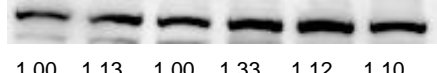

1.00   1.13   1.00   1.33   1.12   1.10

p-S6K

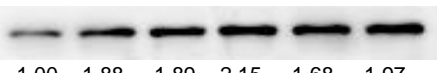

1.00   1.88   1.89   2.15   1.68   1.97

S6K

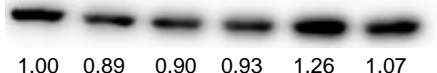

1.00   0.89   0.90   0.93   1.26   1.07

Actin

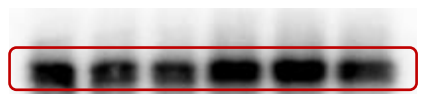

GPX4

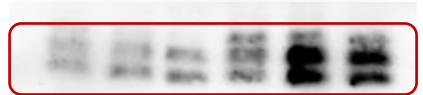

p-4EBP1

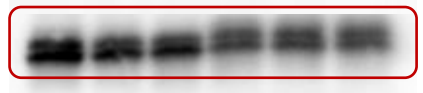

4EBP1

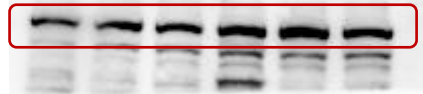

p-S6K

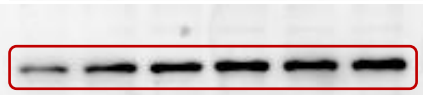

S6K

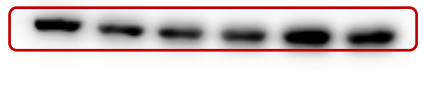

Actin

Figure 7B

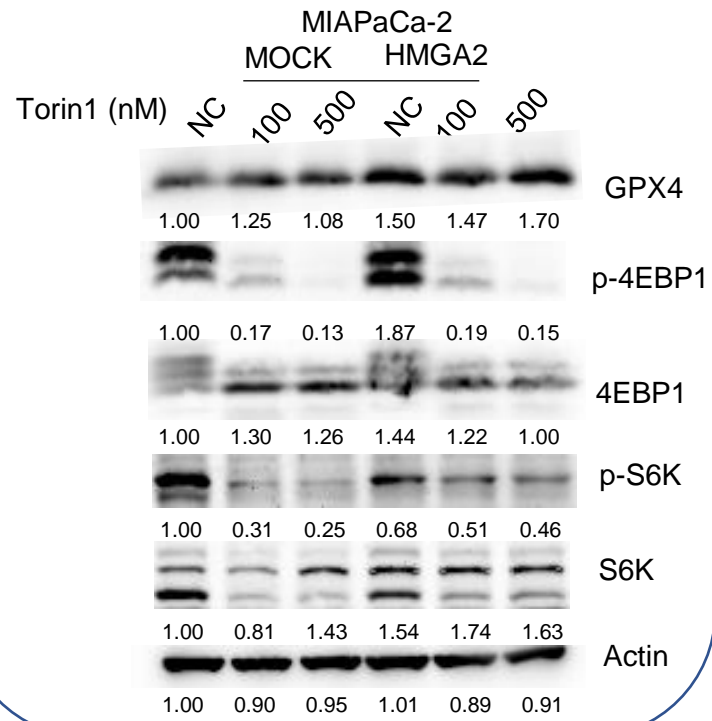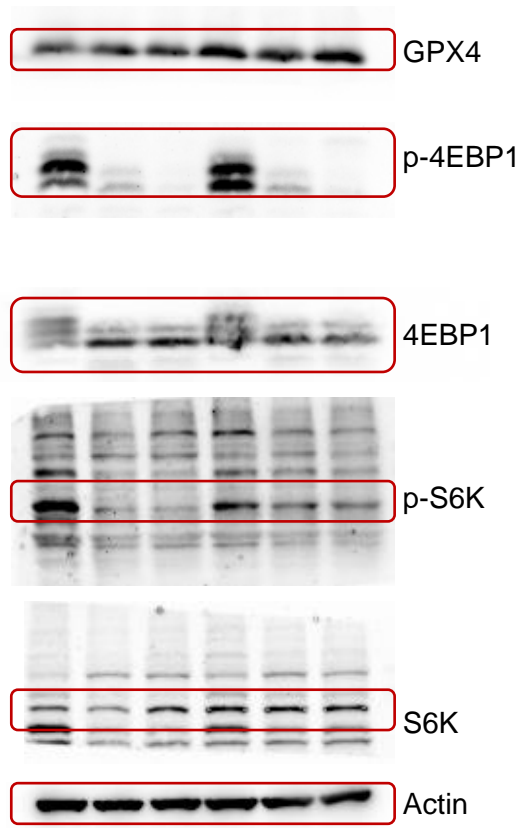

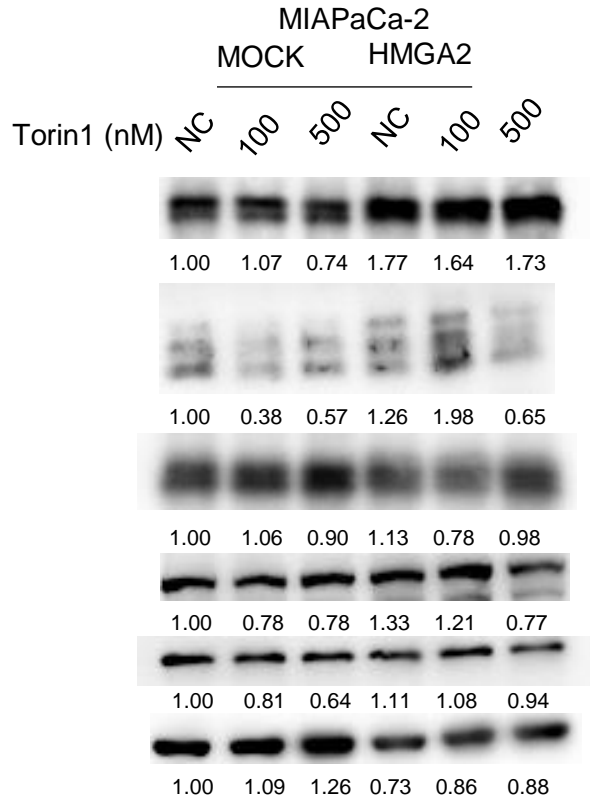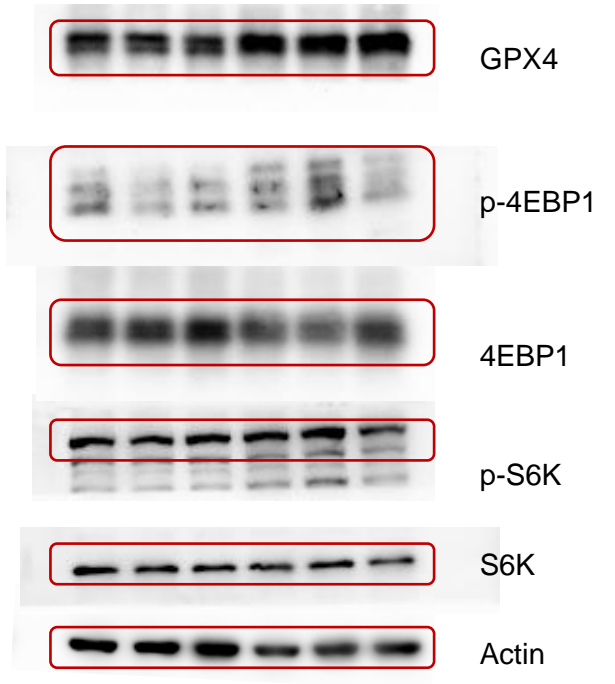

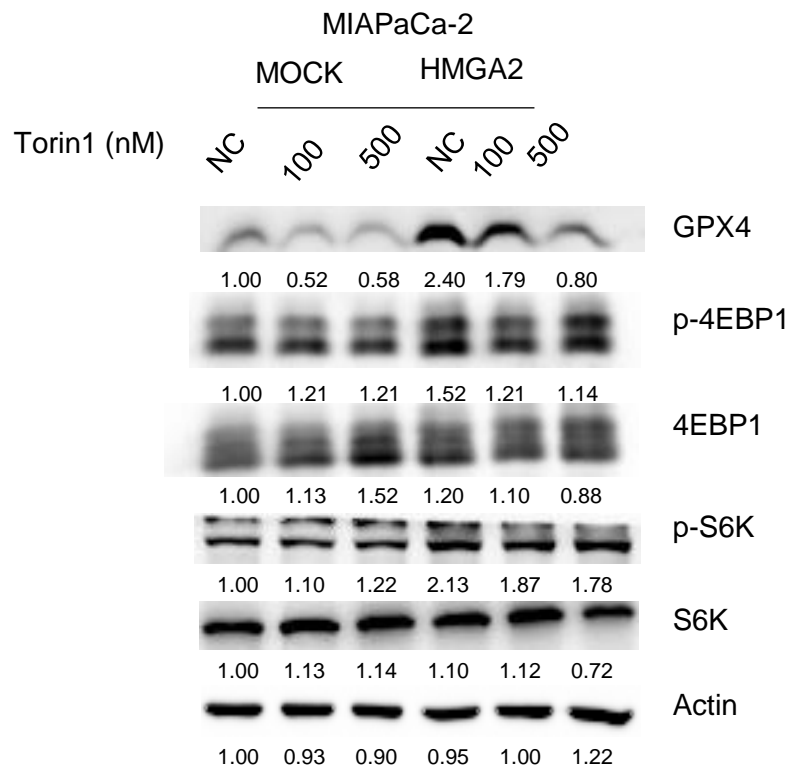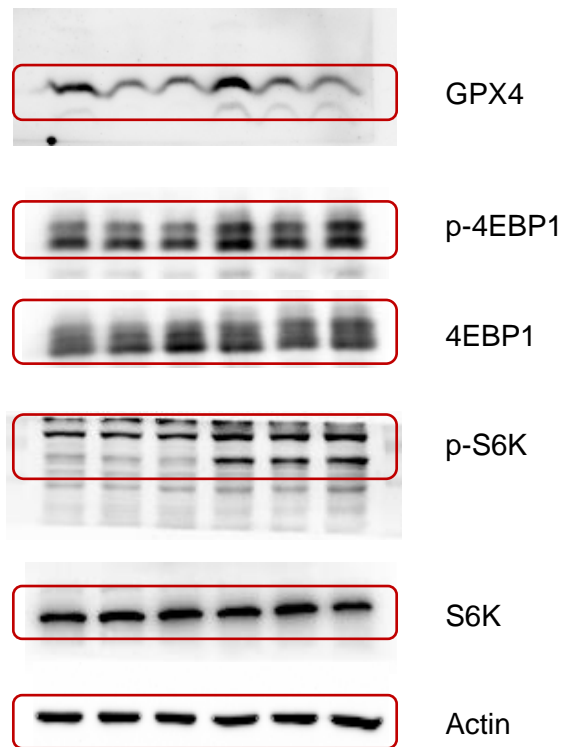

Figure 7C

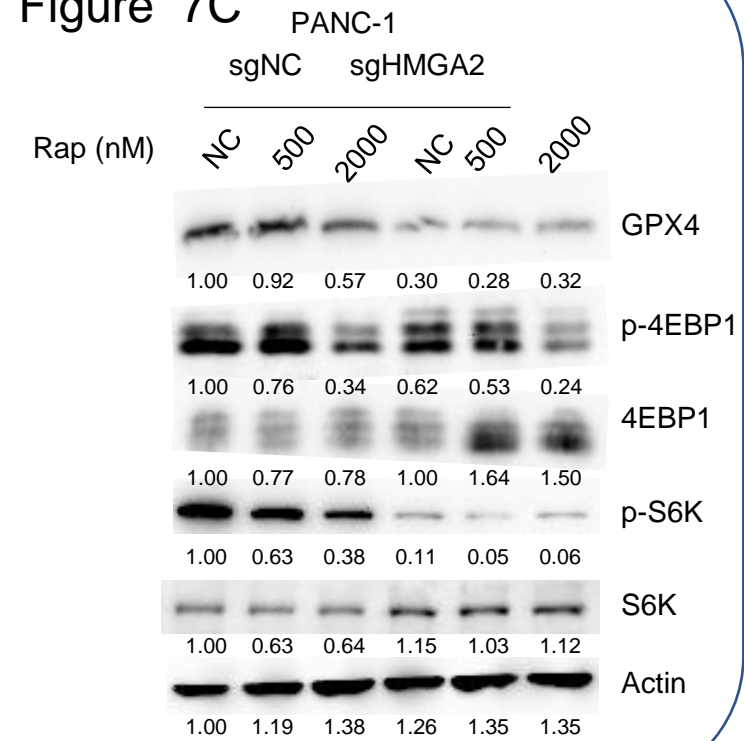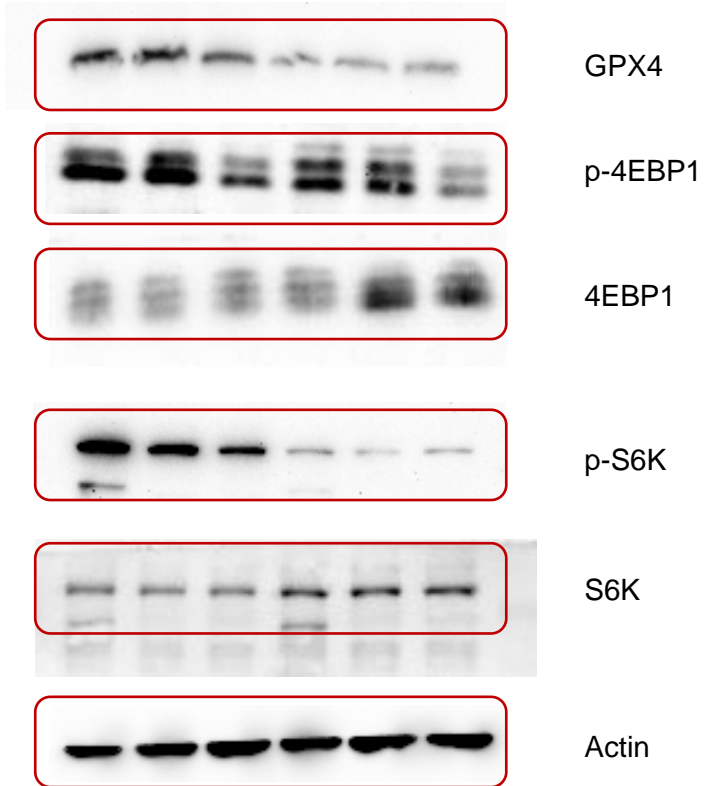



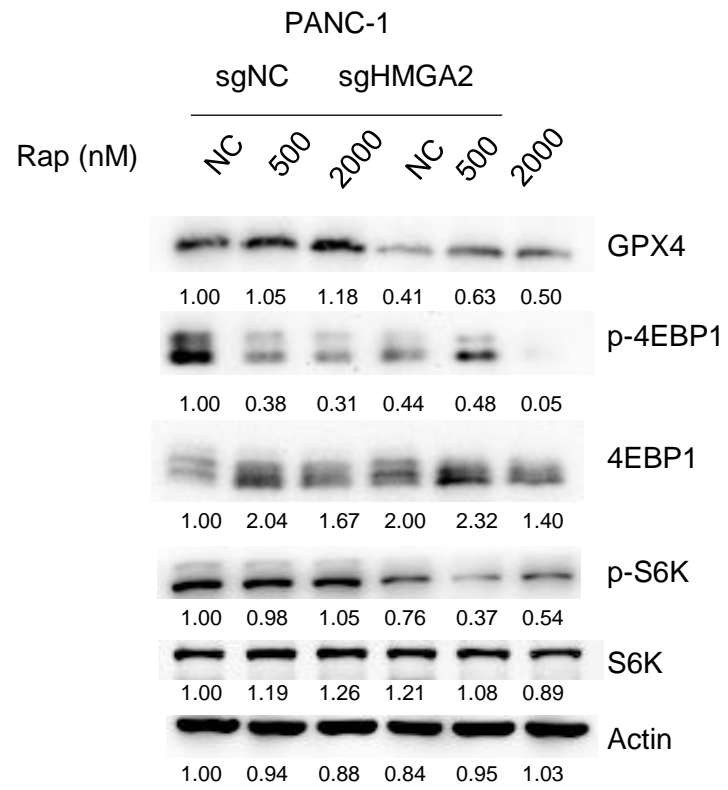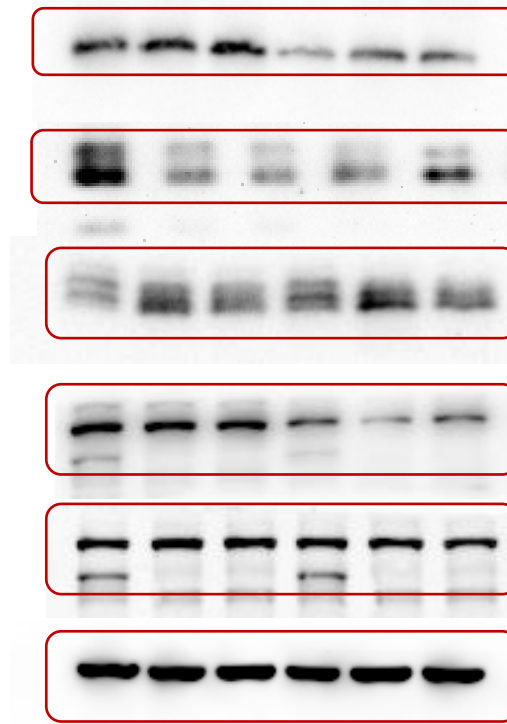

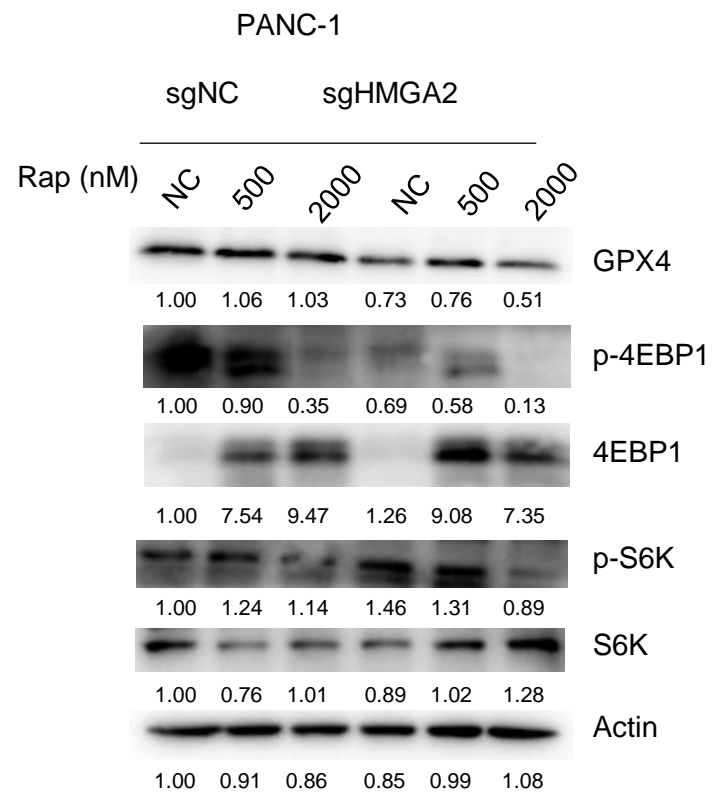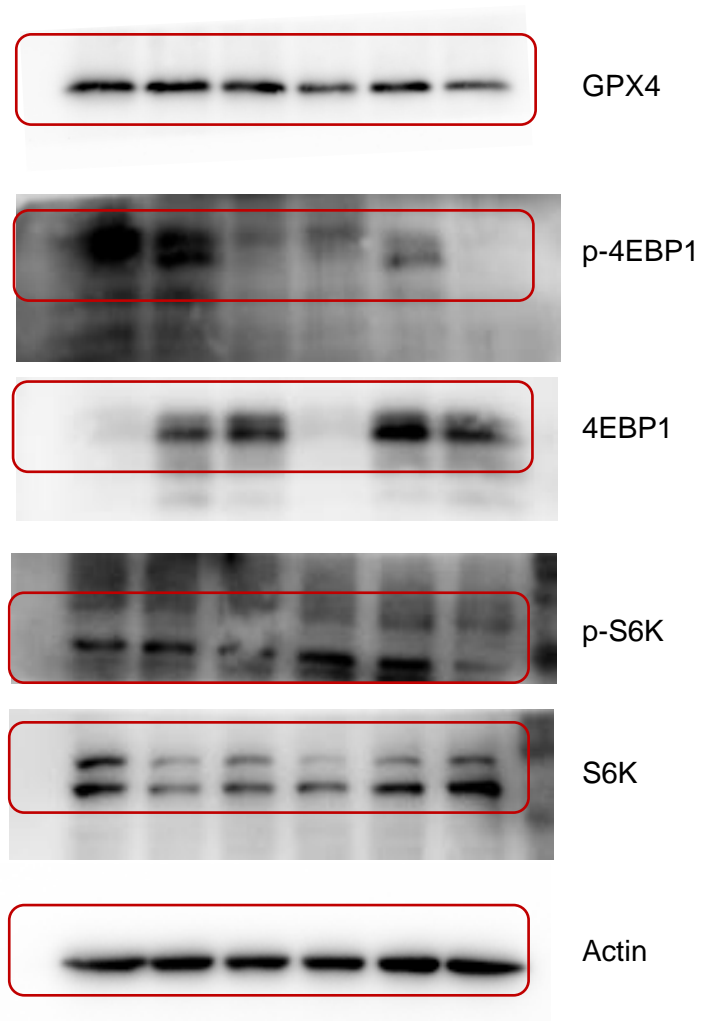

# Figure 7C

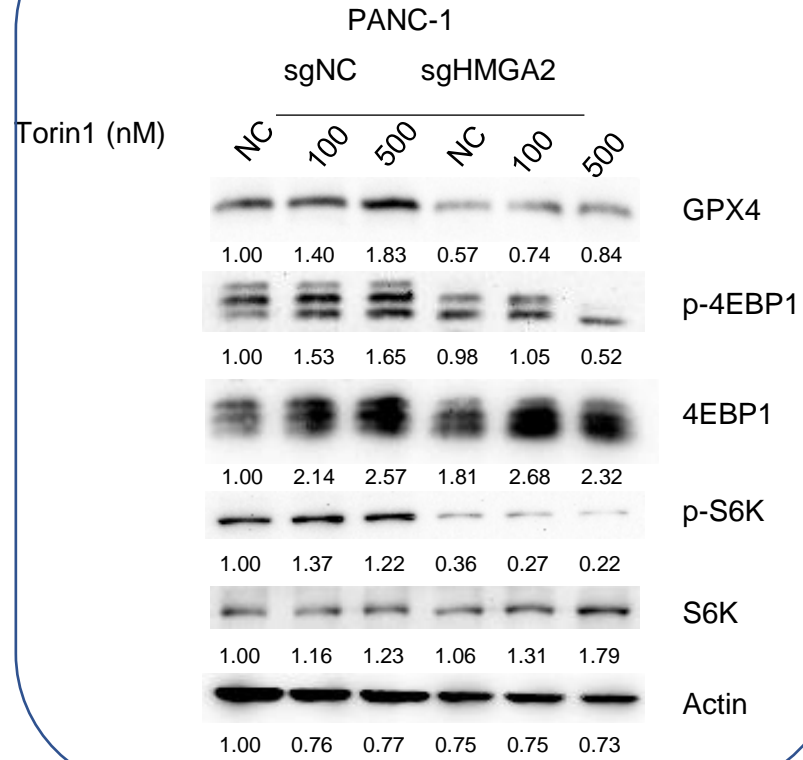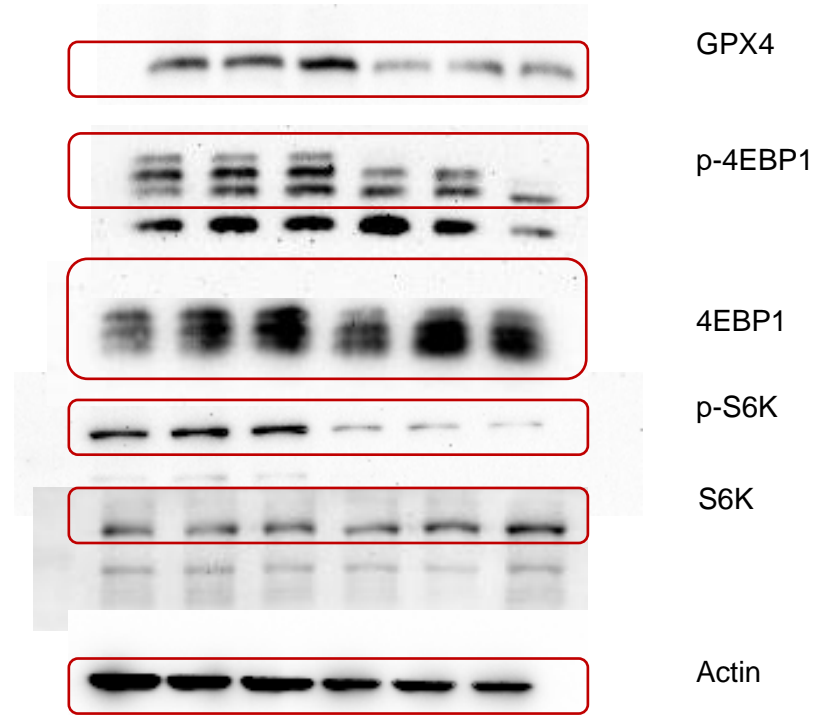

PANC-1

sgNC    sgHMGA2

Torin1 (nM)

NC    100    500    NC    100    500

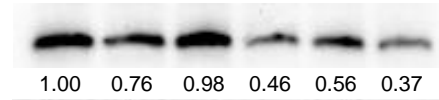

GPX4

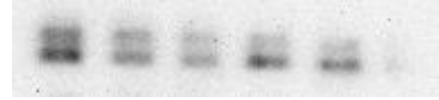

p-4EBP1

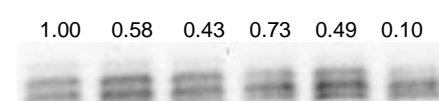

4EBP1

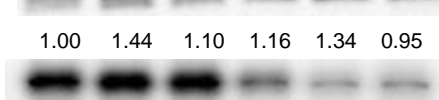

p-S6K

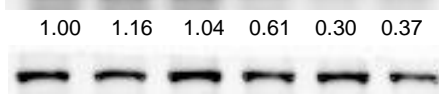

S6K

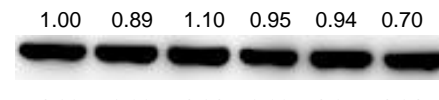

Actin

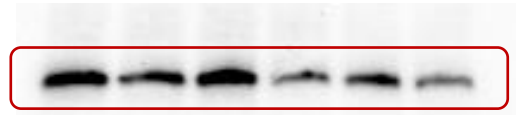

GPX4

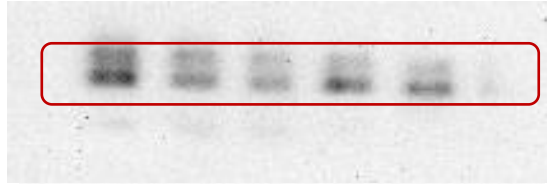

p-4EBP1

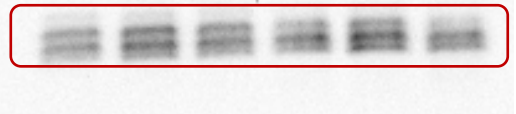

4EBP1

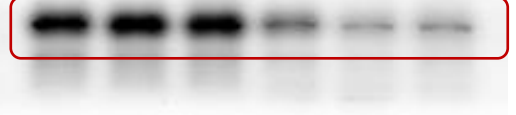

p-S6K

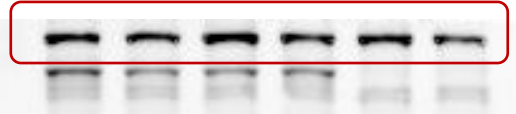

S6K

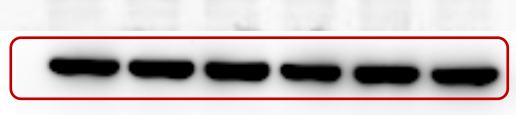

Actin

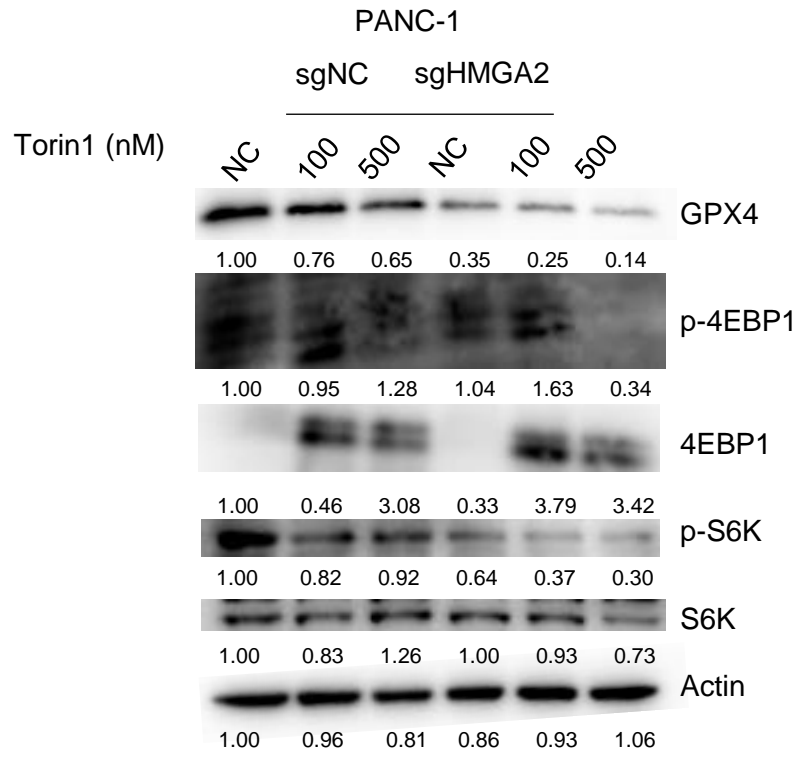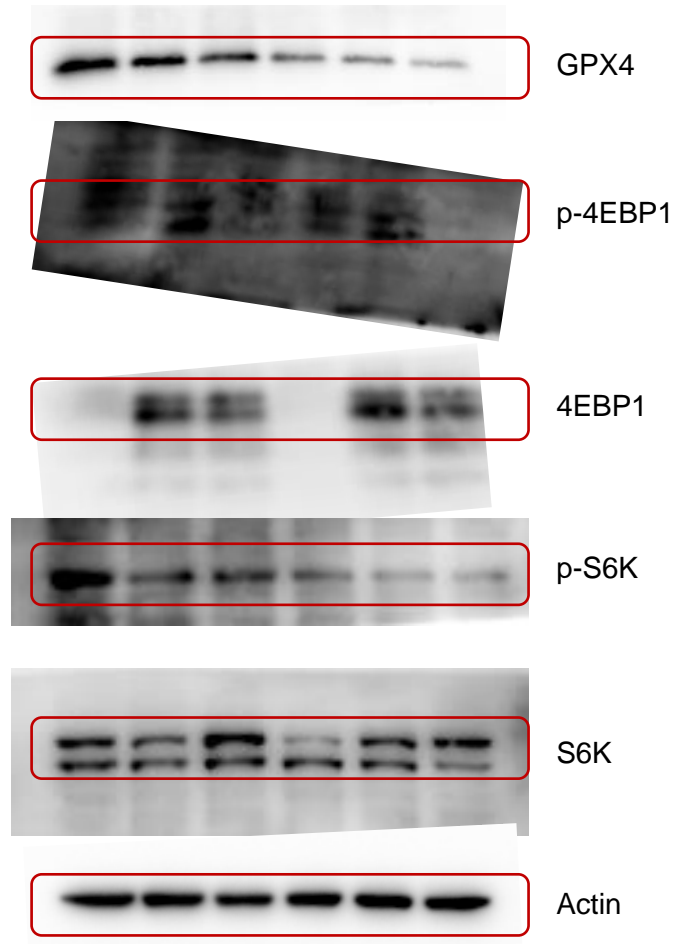

Figure 7D

MiaPaca-2

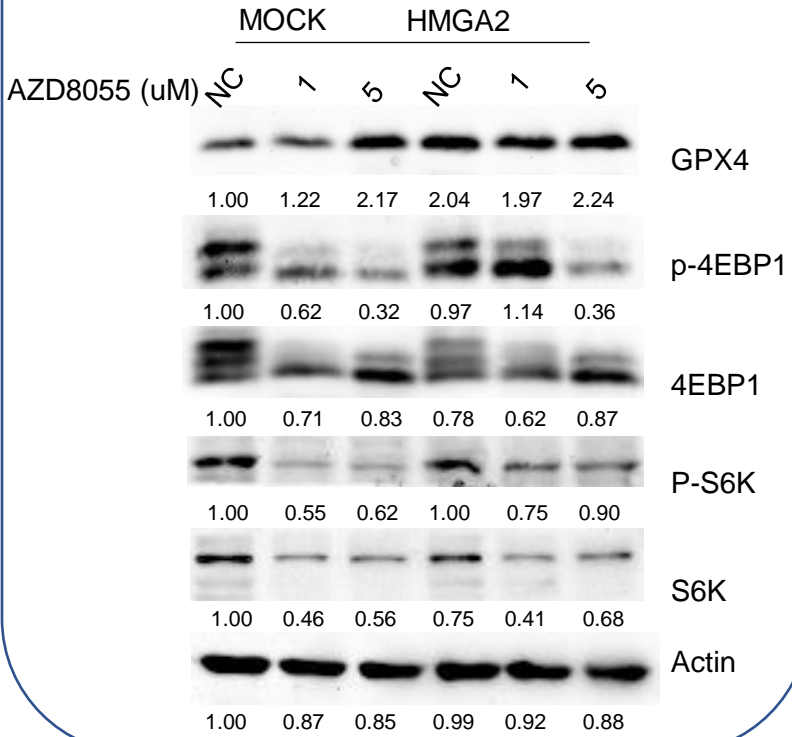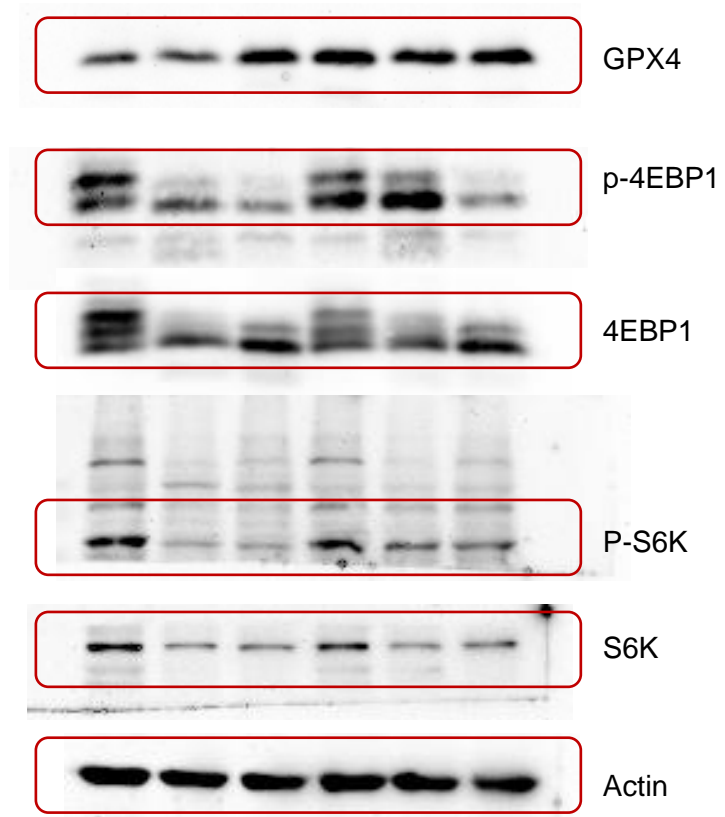

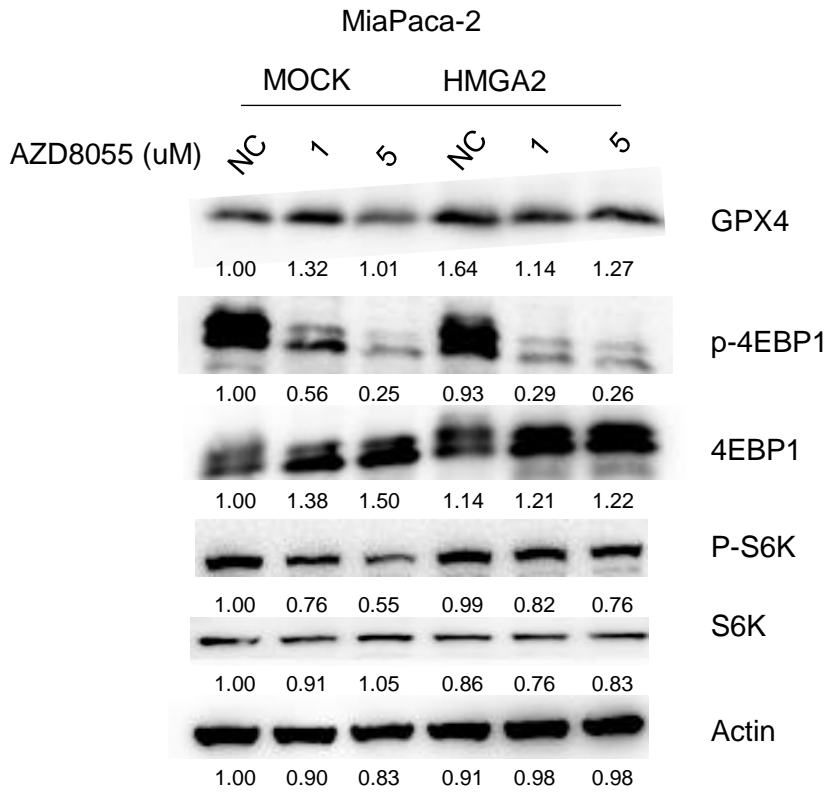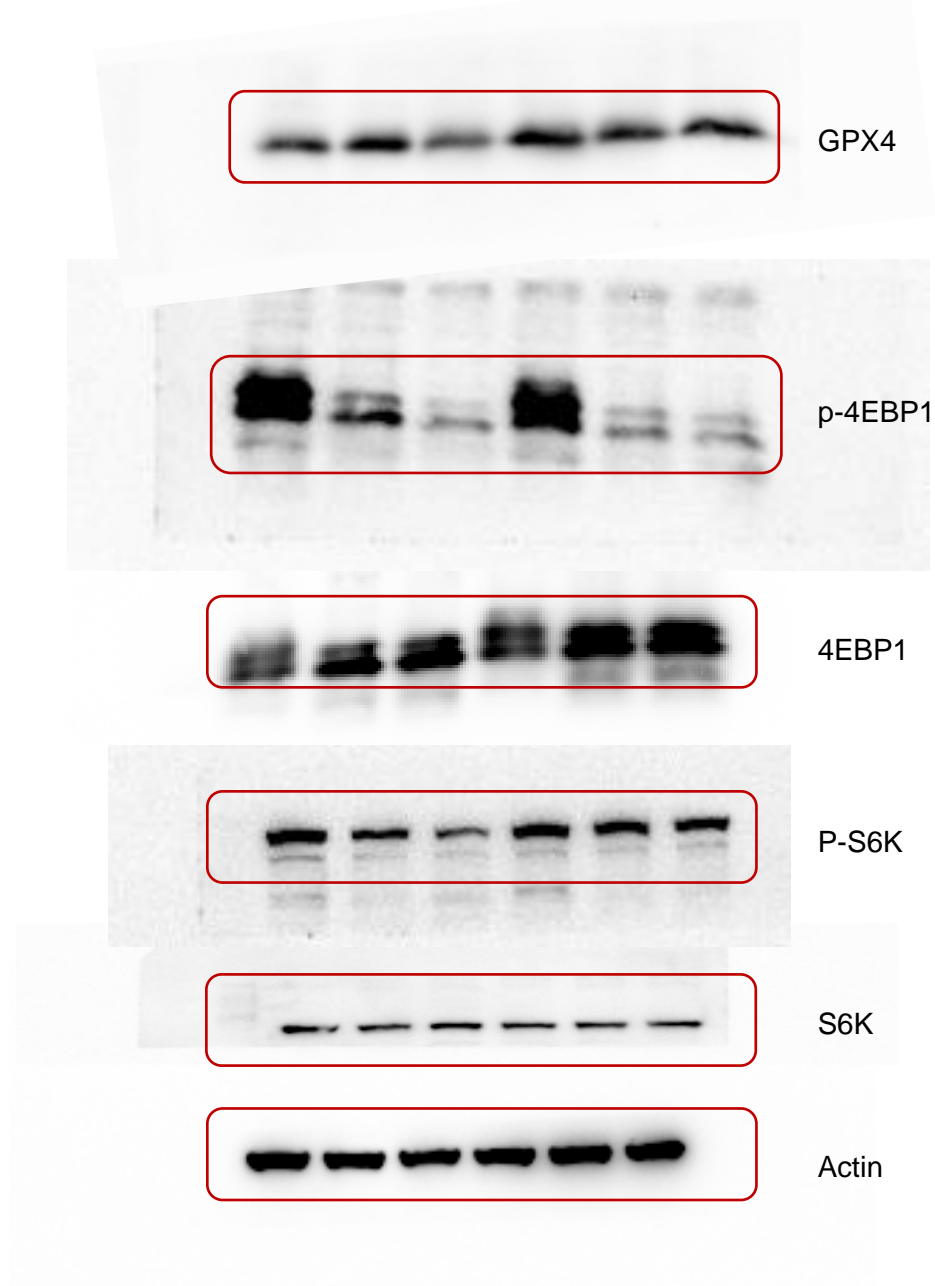

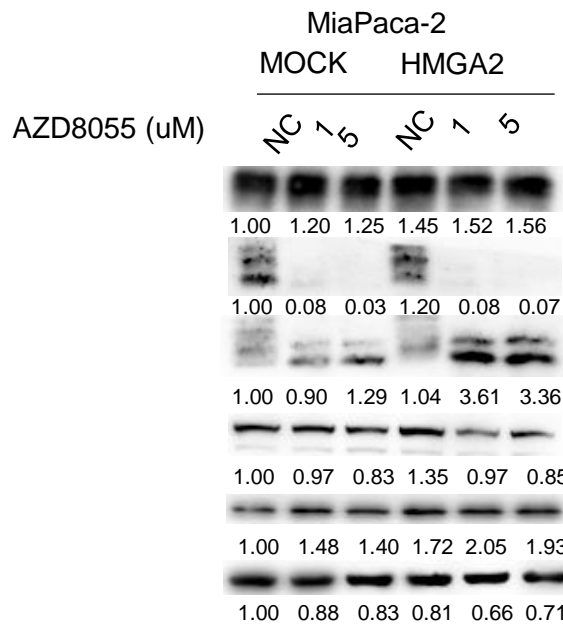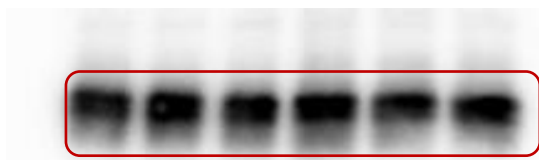

GPX4

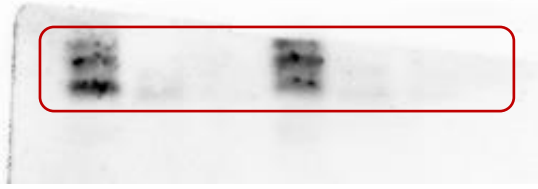

p-4EBP1

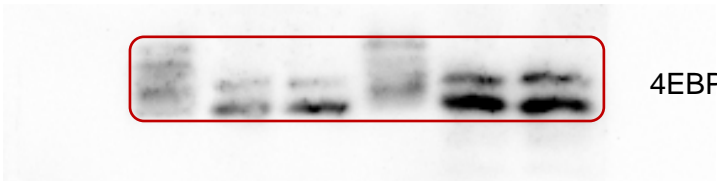

4EBP1

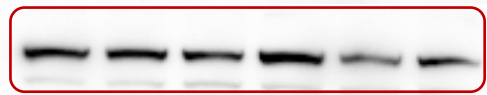

P-S6K

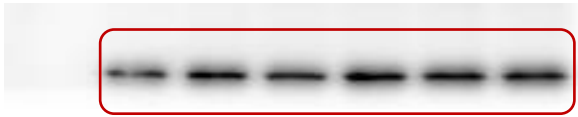

S6K

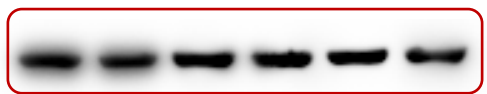

Actin



Figure 7E

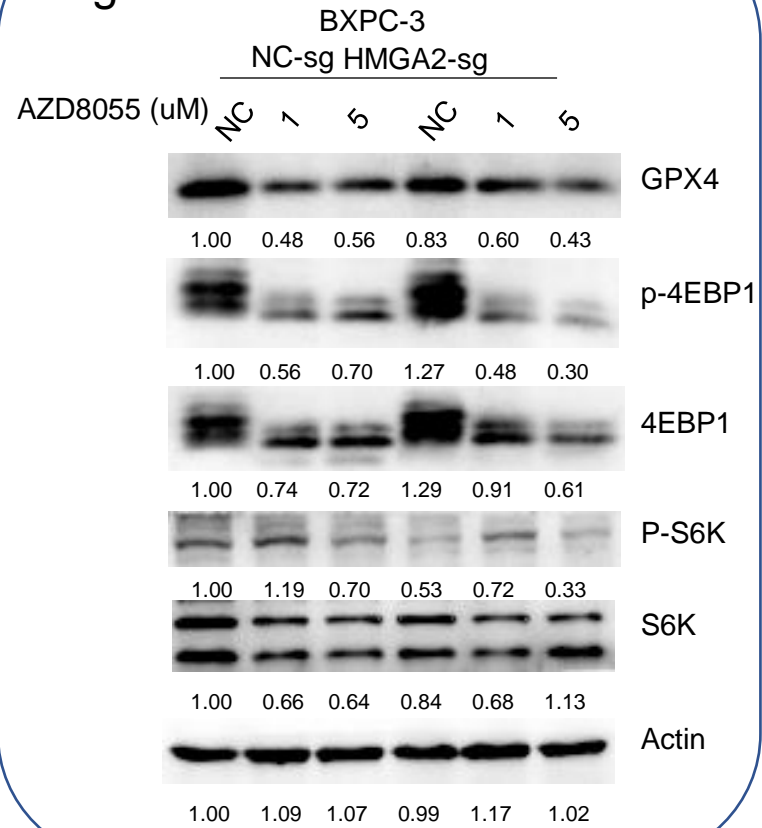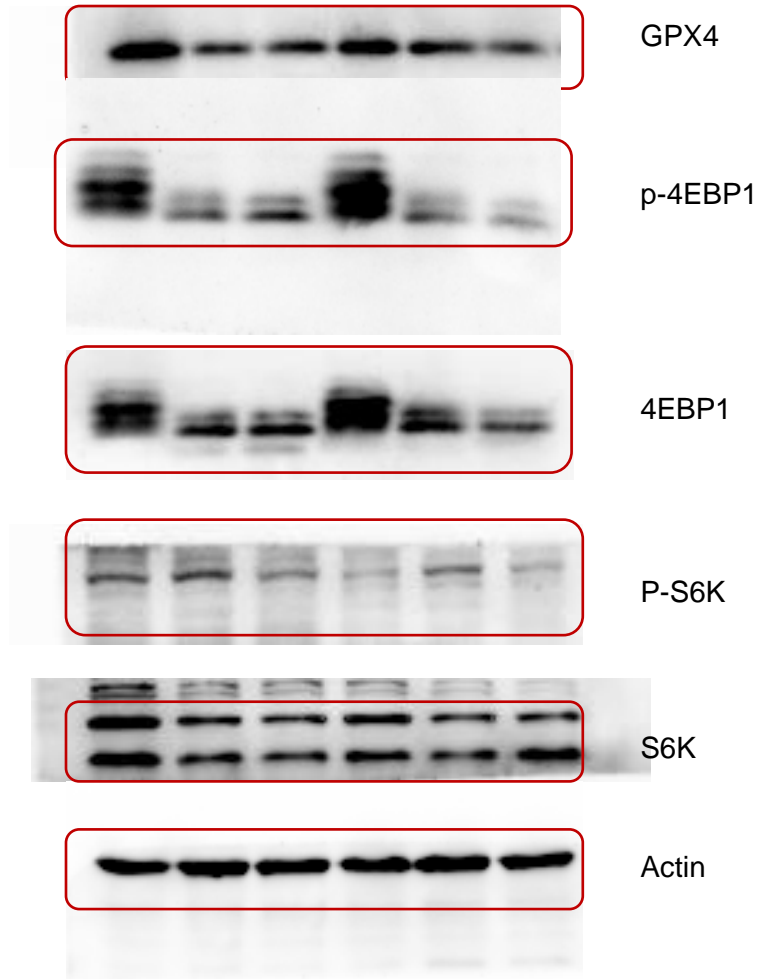

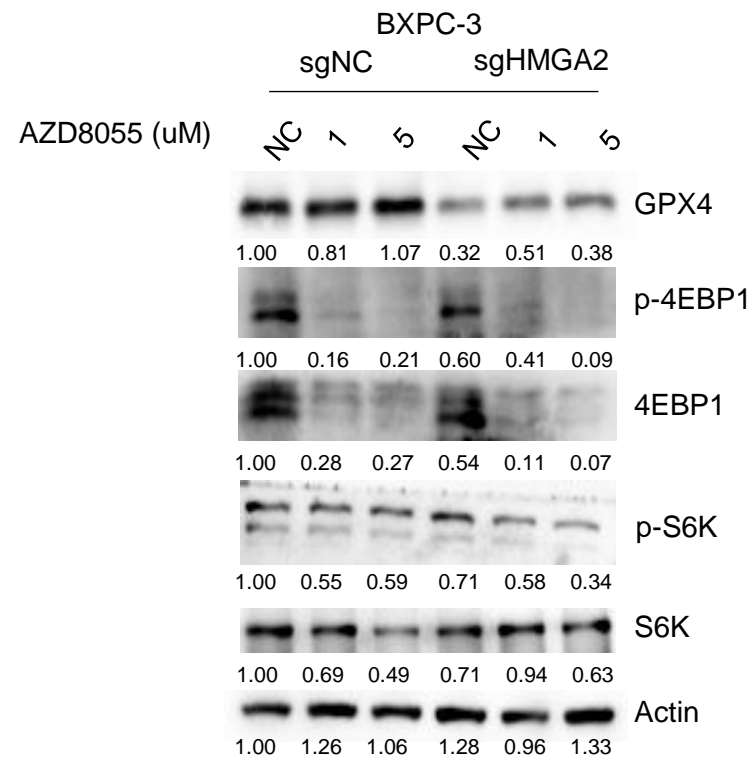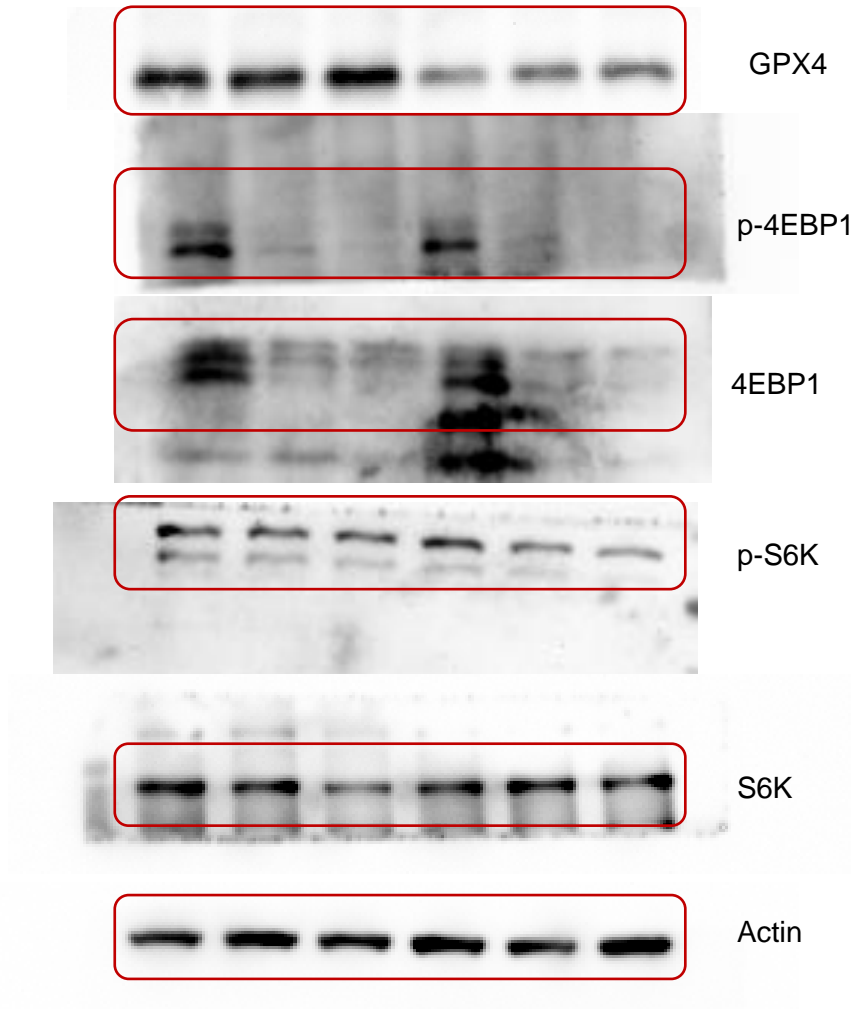

BXPC-3

sgNC      sgHMGA2

AZD8055 (uM)

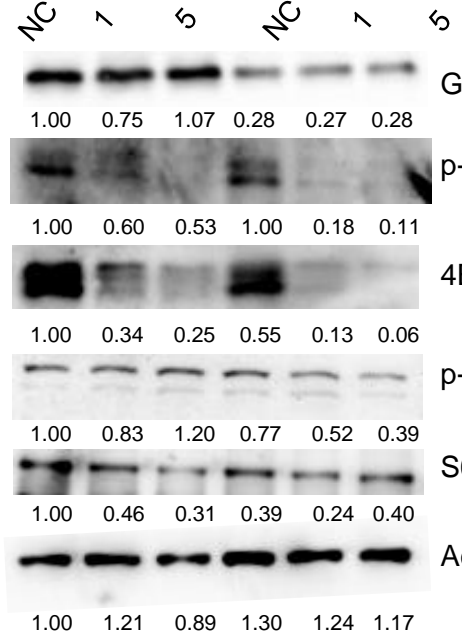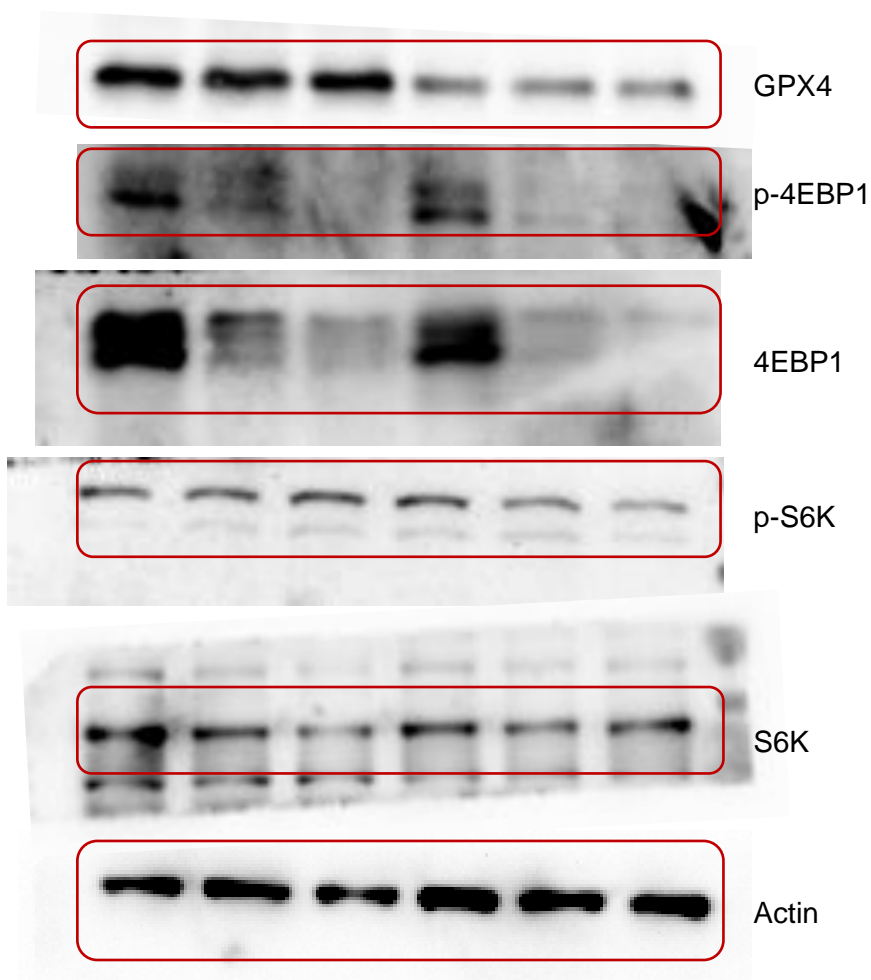

Figure S2B

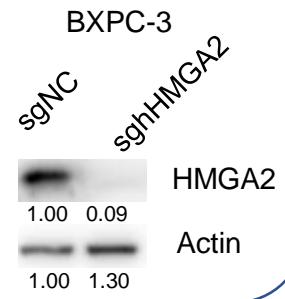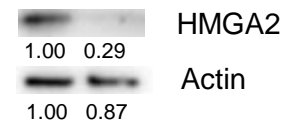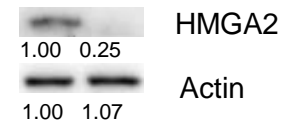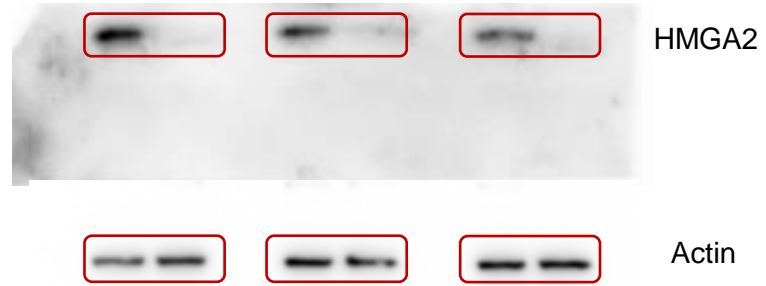

Figure S4D

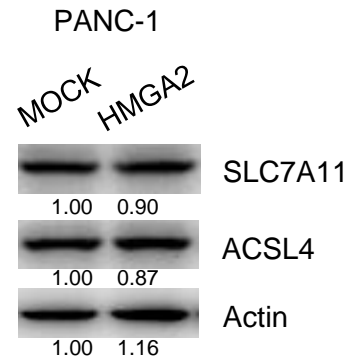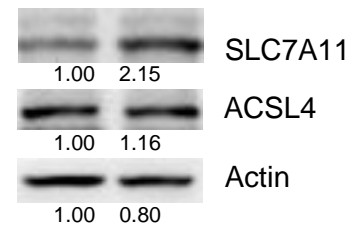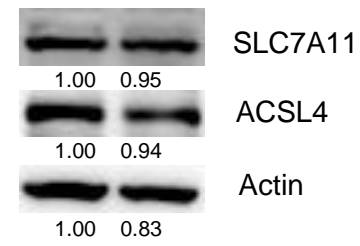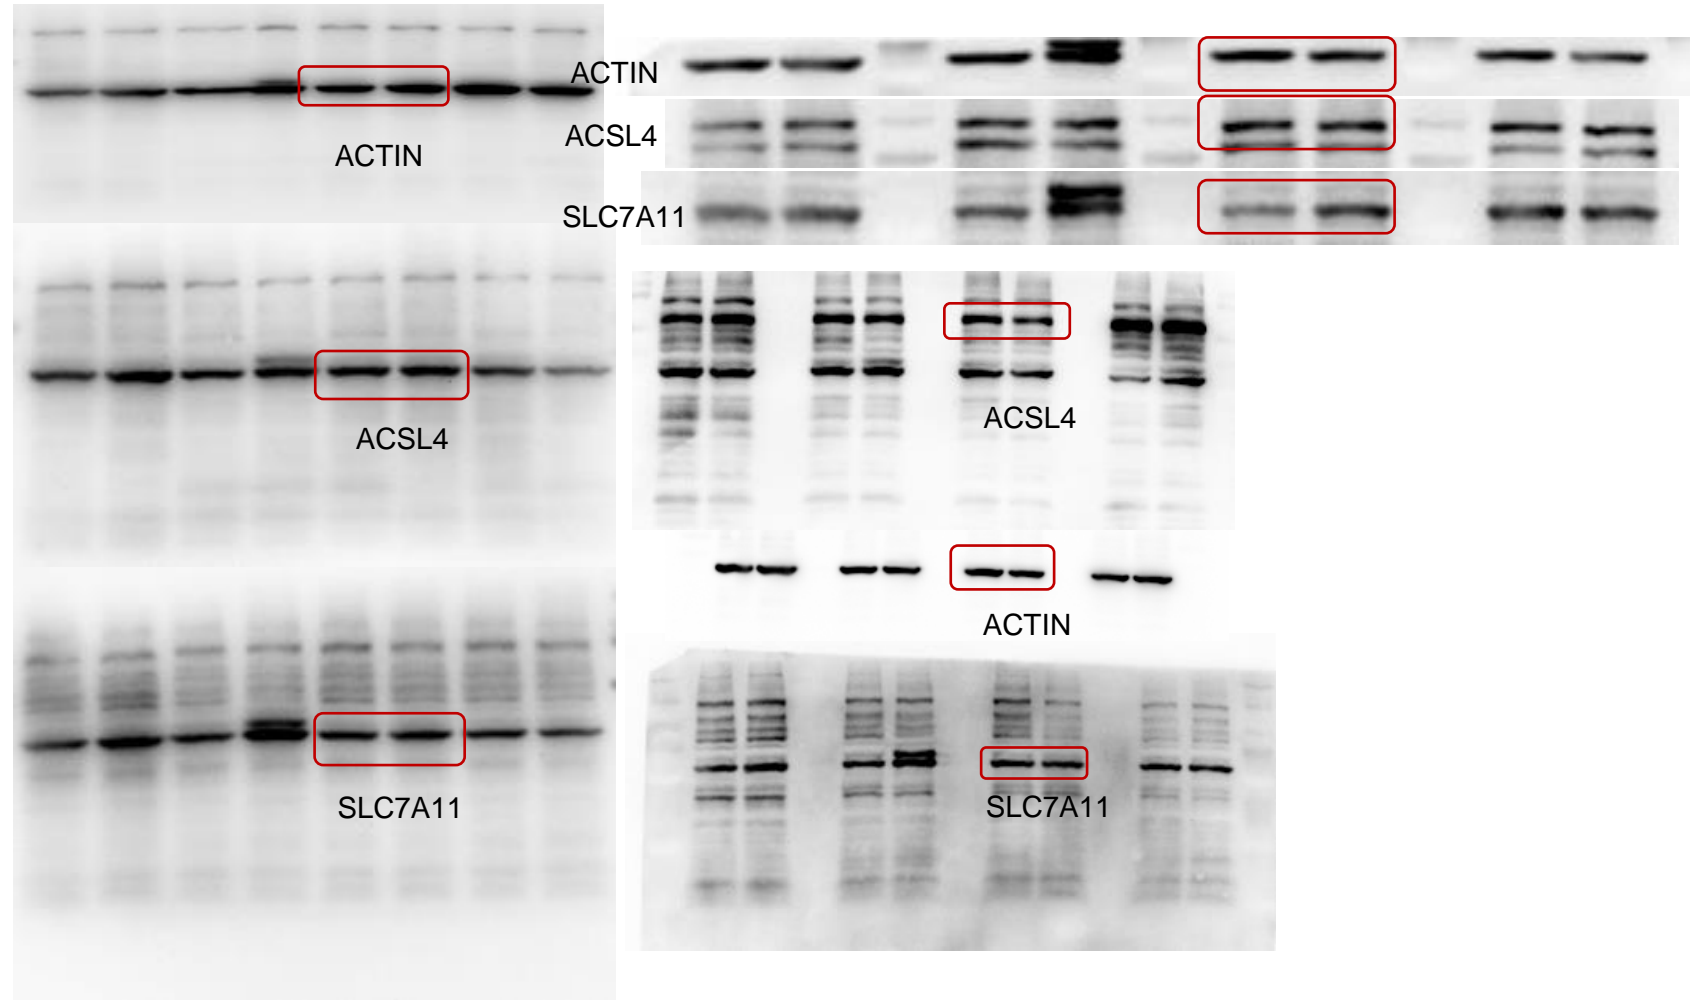

Figure S4D

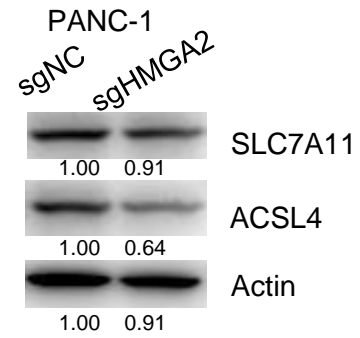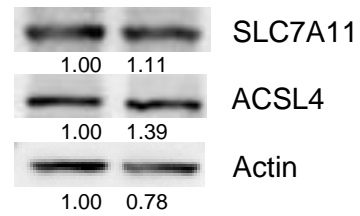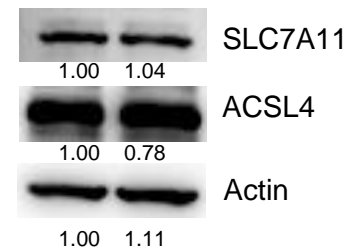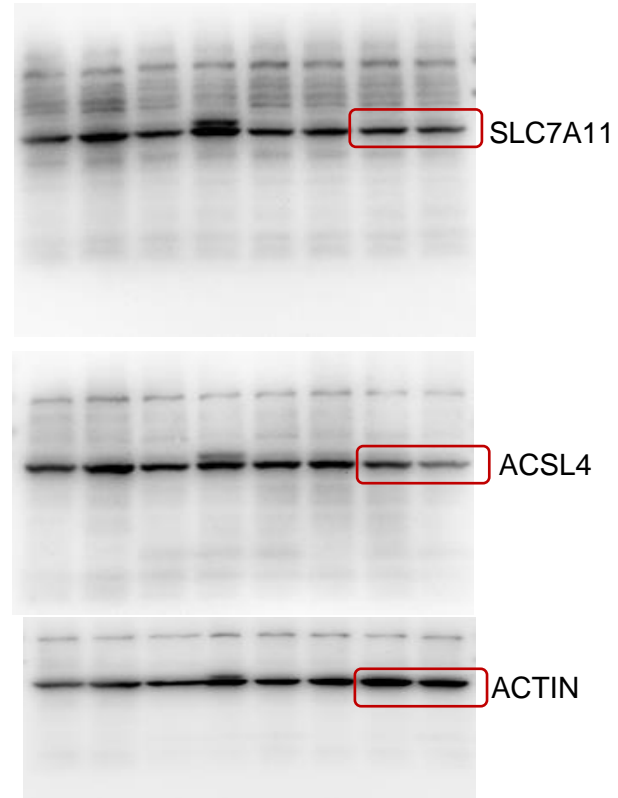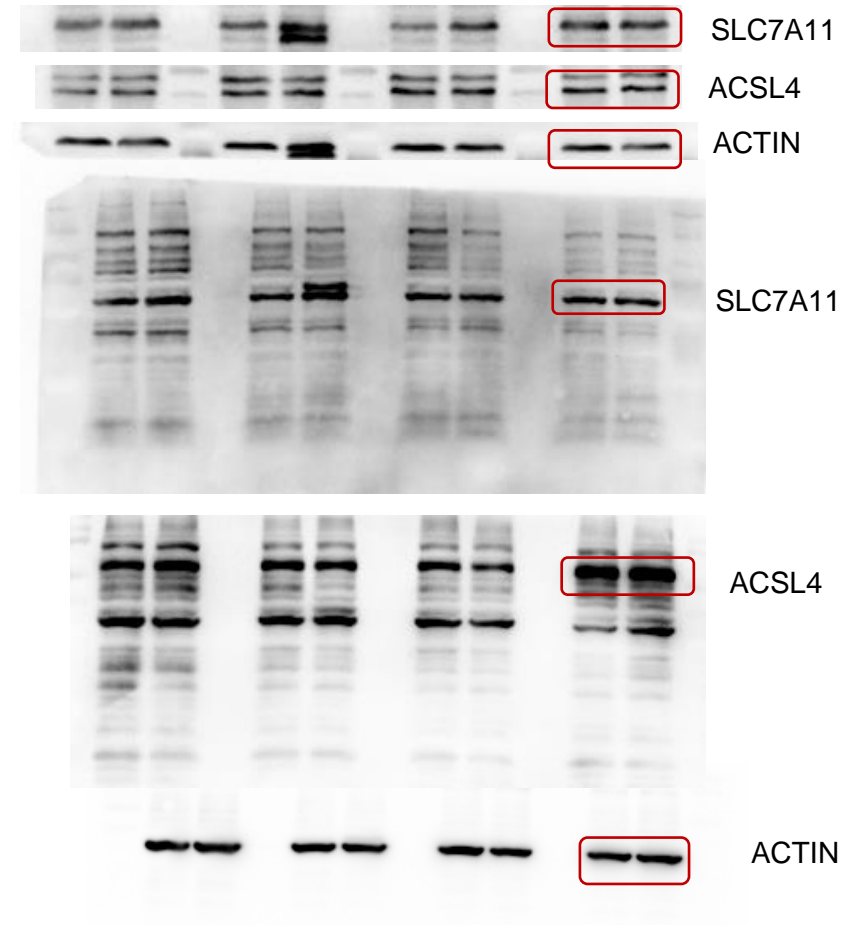

Figure S4F

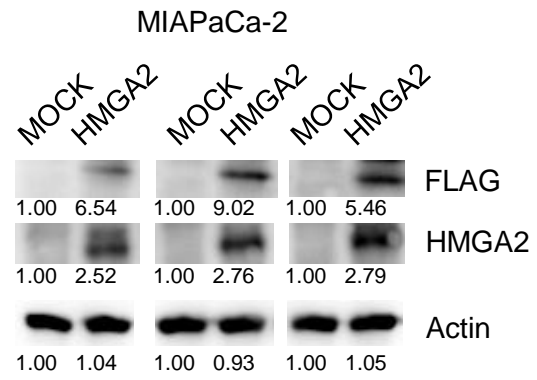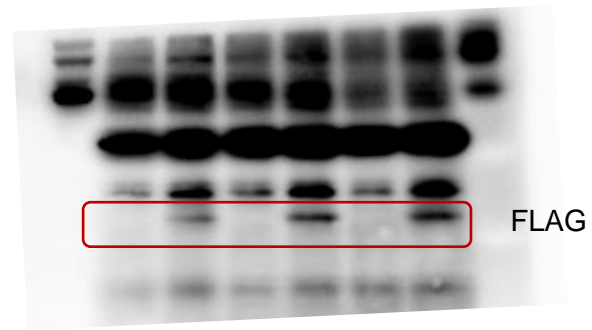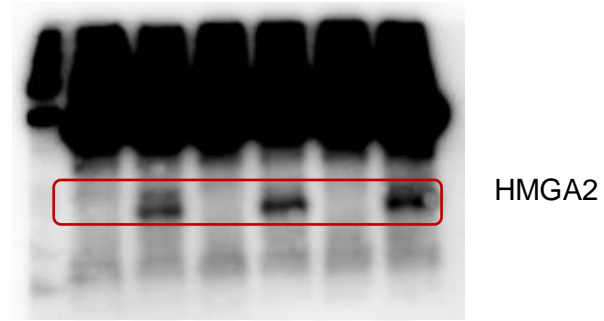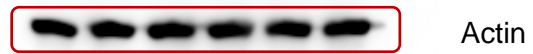

Figure S5A

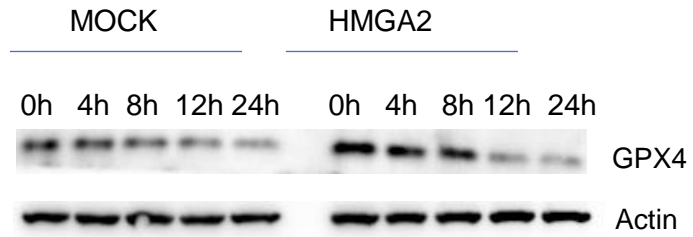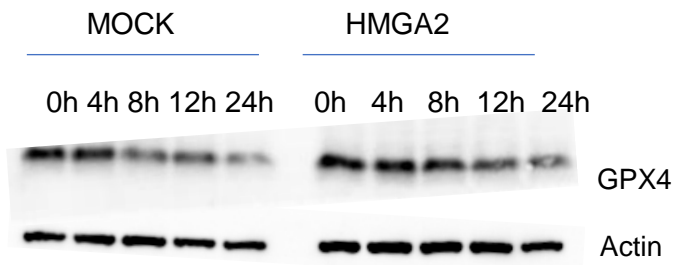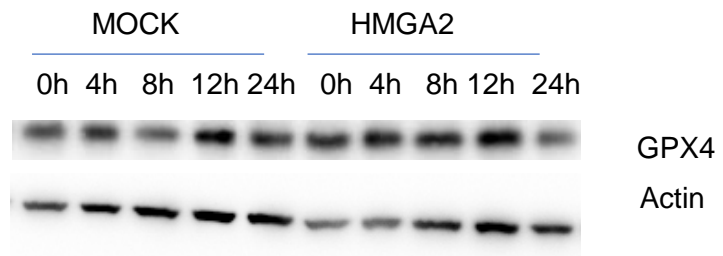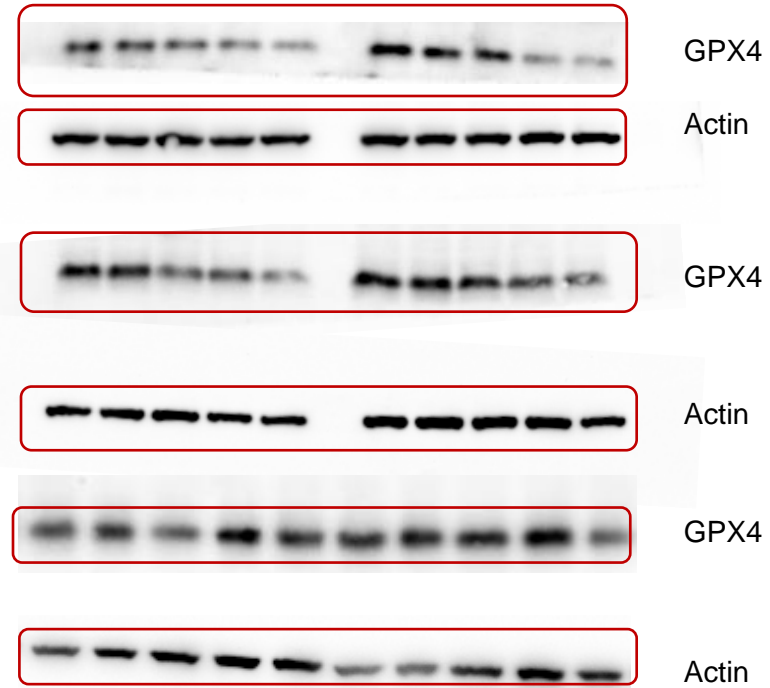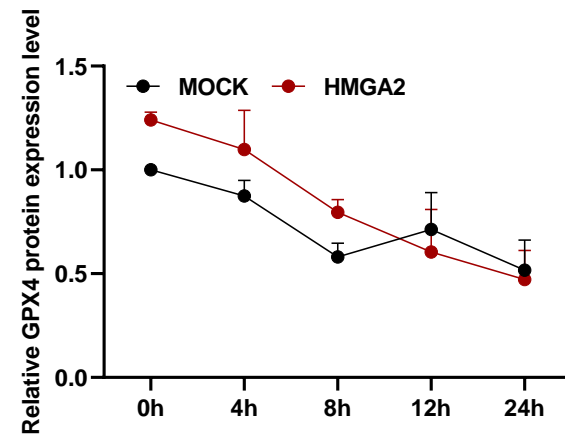



Figure S5B

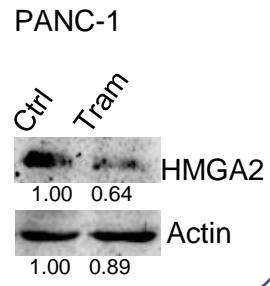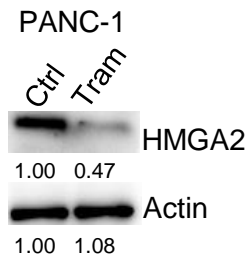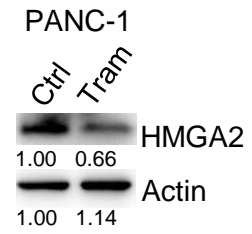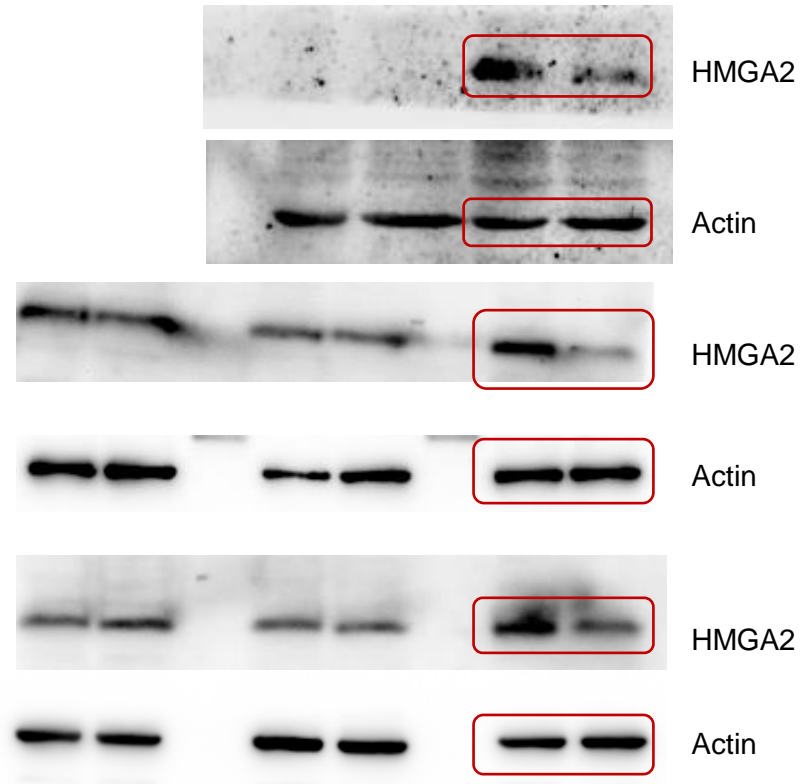

Figure S5B

ASPC-1

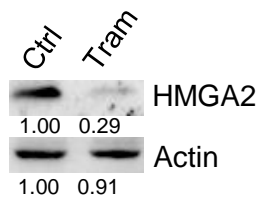

ASPC-1

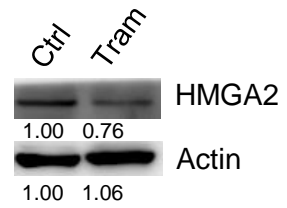

ASPC-1

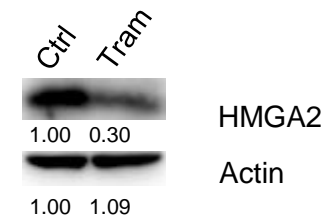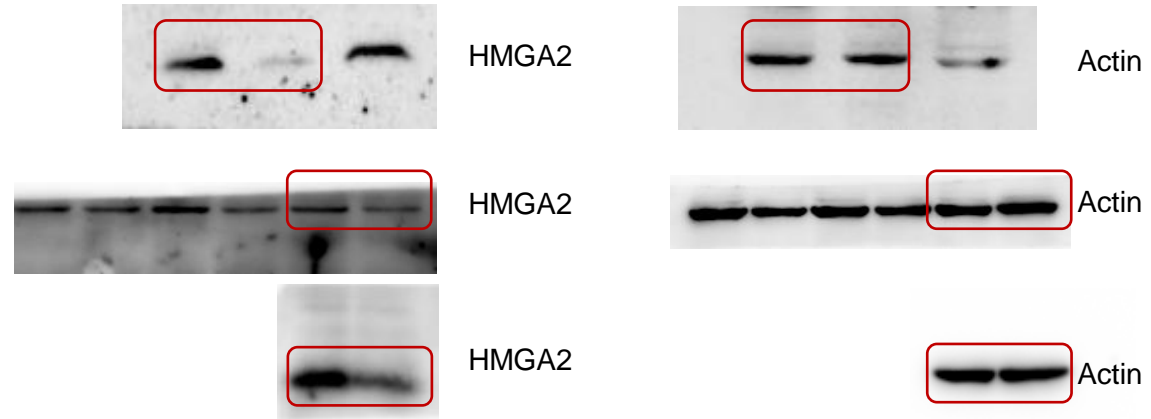

Figure S5B

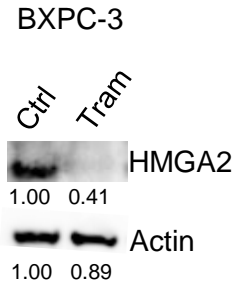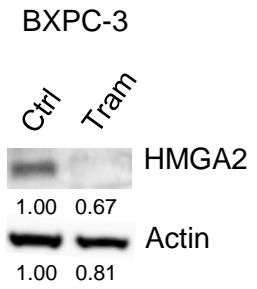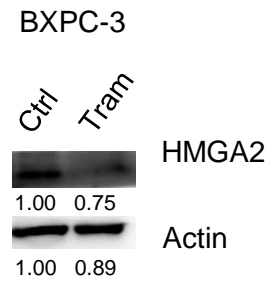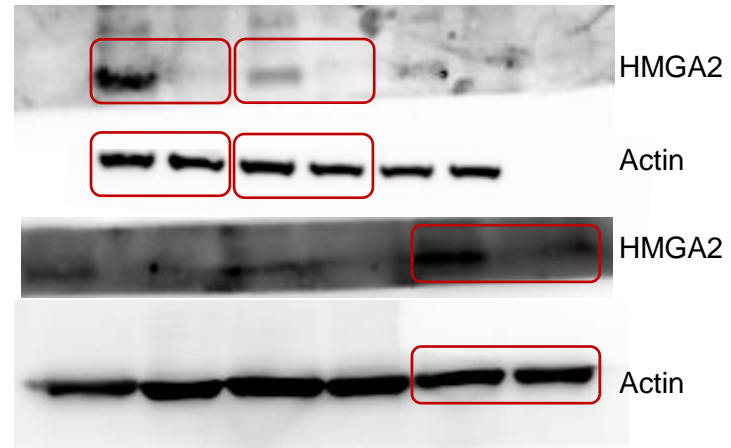

Supplement: 41419_2024_6592_MOESM2_ESM.pdf [file 41419_2024_6592_MOESM2_ESM.pdf]
